# Supplementary material for: Scalable organocatalytic one pot asymmetric Strecker reaction via camphor sulfonyl functionalized crown-ether-tethered calix[4]arene
Source: Royal Society of Chemistry journal article supplement (doi:10.1039/d4cc02674h), 2024-01-01
Supplement: d4cc02674h1.pdf [file d4cc02674h1.pdf]

## SUPPORTING INFORMATION

### Scalable organocatalytic one-pot asymmetric Strecker reaction *via* camphor sulfonyl functionalized crown-ether-tethered calix[4]arene

Apoorva Malik, Kirti Antil, Nikhil Singh, Pragati R Sharma\* and Rakesh K Sharma\*

*Sustainable Materials and Catalysis Research Laboratory (SMCRL), Department of Chemistry, Indian Institute of Technology Jodhpur, Jodhpur-342037, India.*

E-mail: [rks@iitj.ac.in](mailto:rks@iitj.ac.in)

### Contents

|                                                           |              |
|-----------------------------------------------------------|--------------|
| 1. General Information.....                               | ii           |
| 2. Synthesis of Catalysts.....                            | ii-v         |
| 3. Procedure for the asymmetric<br>Strecker reaction..... | v            |
| 4. Characterization of cyanated product.....              | v-xi         |
| 5. S-Clopidogrel Synthesis.....                           | xii-xiii     |
| 6. Recyclability Test .....                               | xiii         |
| 7. Time dependant NMR.....                                | xiv          |
| 8. IR and UV spectra.....                                 | xiv          |
| 9. <sup>29</sup> Si-NMR Spectra.....                      | xv           |
| 10. HRMS Spectra.....                                     | xv           |
| 11. NMR Spectra.....                                      | xvii-xxxvii  |
| 12. HPLC Spectra.....                                     | xxxviii-xliv |
| 13. Reference.....                                        | xlvi         |

## 1. General Information

Starting materials and reagents were used without purification unless otherwise mentioned and were purchased from commercial suppliers. Reaction temperatures were measured externally; reactions were monitored by analytical thin layer chromatography (TLC), Merk 60 F<sub>254</sub> Aluminium coated plates and visualized by UV light. Column chromatography was performed on silica gel (60-120 mesh) and the solvents employed were of analytical grade purified before Use. The enantiomeric excess (ee) of the cyanated products was determined by HPLC measurements carried out using a thermoscientific Vanquish detector Model: VC-D11-A equipped with chiral columns DAICEL 4.6 mm × 250 mm Chiralpak- AD-H using condition n-Hexane/isopropanol solvent system. Optical rotation values were measured on a JASCO P-1010 polarimeter at  $\lambda = 589$  nm, corresponding to the sodium D line, at the temperatures indicated. NMR spectra were recorded on a Bruker 500 spectrophotometer <sup>1</sup>H NMR, <sup>13</sup>C and <sup>29</sup>Si spectra were recorded on 500, 126 and 500 MHz respectively. Chemical shifts ( $\delta$ ) are reported in ppm relative to the residual solvent peak (<sup>1</sup>H CDCl<sub>3</sub>,  $\delta = 7.26$ ; <sup>13</sup>C CDCl<sub>3</sub>,  $\delta = 77.0$ ) and the following abbreviations designate the multiplicity of each signal: s, singlet; d, doublet; t, triplet; m, multiplet; bs, broad singlet; bd, broad doublet. Coupling constants (J) are quoted in Hertz. High-resolution mass spectra (HRMS) were acquired using an Agilent technologies model G6564 QTOF. The samples were ionized in positive ion mode using a MALDI or ESI ionization source. Calix[4] arene was synthesised via reported procedure <sup>1</sup>

## 2. Synthesis of catalyst

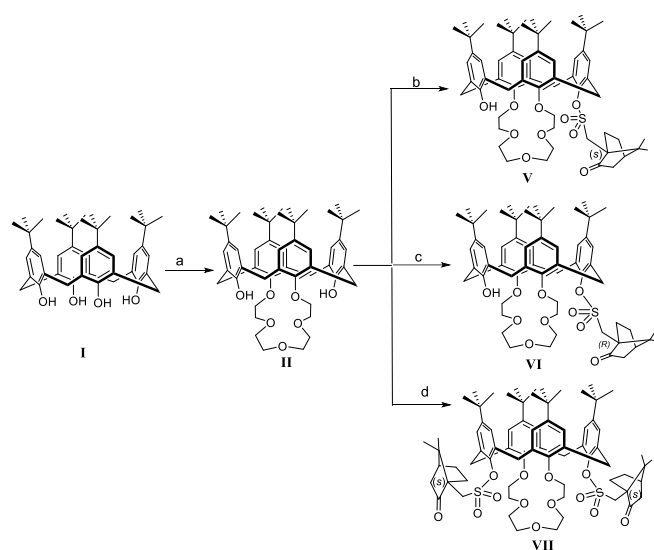

Reaction conditions: (a) dry toluene, p-tert-butylcalix[4]arene (1.46 g, 2.25 mmol), <sup>t</sup>BuOK (0.46 g, 4 mmol), reflux, tetraethylene glycol ditosylate (1.06g, 2 mmol); (b) II, Dry THF/DMF (16:1), NaH (0.06g, 1.62 mmol), (+)-10-Camphorsulfonyl chloride (0.4g, 1.65 mmol). (c) II, Dry THF/DMF (16:1), NaH (0.06g, 1.62 mmol), (-)-10-Camphorsulfonyl chloride (0.4g, 1.65 mmol) (d) II, Dry THF/DMF (16:1), NaH (0.14g, 3.24 mmol), (+)-10-Camphorsulfonyl chloride (0.8g, 3.3 mmol)

### Step a: Synthesis of p-tert-butylcalix[4]arene-crown-5 (II) :

A mixture of p-tert-butylcalix[4]arene (I, 1.46 g, 2.25 mmol) and <sup>t</sup>BuOK (0.23 g, 2 mmol) in 50 mL of dry toluene was refluxed (using heating blocks) under nitrogen gas with stirring for 1.5 h, then tetraethylene glycol ditosylate (1.06 g, 2 mmol) was added. After refluxing for 24

h, a second portion of <sup>t</sup>BuOK (0.23 g, 2 mmol) was added, and the reaction mixture was refluxed for an additional 24 h. It was then cooled to room temperature, treated with 1 N HCl (125 mL), and extracted five or six times with 30 mL of diethyl ether each time. The combined organic layers were finally washed three times with water (100 mL each time), and the solvent was removed by rotary evaporation. The crude product was purified by column chromatography using silica as packing material and dichloromethane/ethyl acetate (4:1) as eluent gives white solid, 1.17 g, 65% yield of I, <sup>1</sup>H NMR (500 MHz, CDCl<sub>3</sub>) δ 7.07 (s, 4H), 6.75 (s, 4H), 4.38 (d, *J* = 13.0 Hz, 4H), 4.08 (s, 8H), 3.97 (t, *J* = 5.5 Hz, 4H), 3.85 (t, *J* = 5.5 Hz, 4H), 3.30 (d, *J* = 13.0 Hz, 4H), 1.31 (s, 20H), 0.91 (s, 16H); <sup>13</sup>C NMR (126 MHz, Chloroform-*d*): 150.8, 149.8, 146.8, 141.2, 132.5, 129.8, 127.8, 125.4, 124.9, 71.0, 70.8, 70.3, 33.8, 31.7, 31.0

### **Step b: Synthesis of calix[4]arene-crown-5 tethered with (+)-10-camphorsulfonyl catalyst (V):**

To a solution of calix[4]crown-5 II (1.2g, 1.5 mmol) in DryTHF/DMF mixture (16/1), a 60% suspension of sodium hydride in mineral oil was added (0.06g, 1.62 mmol). After stirring the reaction mixture at room temperature for 2 hours, (+)-10-camphor sulfonyl chloride (0.40g, 1.65 mmol; mp 69°C ([α]<sup>28</sup><sub>D</sub> = +36° C2, CHCl<sub>3</sub>)) in THF (2.5 mL) was added. The reaction mixture was stirred at ambient temperature for 18h. The solvent was removed under vacuum and the oily residue was dissolved into chloroform and washed with saturated NH<sub>4</sub>Cl solution. Then the organic layer was dried over Na<sub>2</sub>SO<sub>4</sub>. The residue was further purified through column chromatography CH<sub>2</sub>Cl<sub>2</sub>/MeOH = 95/5 to 60/40 as eluent to afford **V** as a white crystalline solid (1.14 g, 76%); [α]<sup>28</sup><sub>D</sub> = +52° (c 1, CHCl<sub>3</sub>); <sup>1</sup>H NMR (500 MHz, Chloroform-*d*) δ 7.19 (s, 1H), 7.07 (s, 4H), 6.75 (s, 4H), 4.60 (m, 1H), 4.37 (d, *J* = 13.0 Hz, 4H), 4.08 (s, 8H), 3.97 (t, *J* = 5.3 Hz, 4H), 3.84 (t, *J* = 5.5 Hz, 4H), 3.29 (d, *J* = 13.0 Hz, 4H), 3.18 (s, 1H), 2.06 – 1.94 (m, 3H), 1.31 (s, 18H), 1.19 (s, 3H), 1.11 (s, 3H), 1.04 (d, *J* = 7.4 Hz, 6H), 0.91 (s, 18H). <sup>13</sup>C NMR (126 MHz, Chloroform-*d*) δ 214.73, 214.17, 150.82, 149.82, 146.85, 141.23, 135.12, 134.93, 134.83, 134.30, 134.24, 132.51, 127.85, 125.56, 125.35, 125.01, 124.96, 71.26, 71.07, 70.90, 70.69, 70.37, 70.06, 58.66, 58.39, 47.81, 47.70, 43.37, 43.11, 42.49, 33.89, 33.85, 31.68, 31.34, 31.04, 30.97, 20.35, 20.17, 20.07, 19.96, 19.78. HRMS (ESI+) *m/z* [M + H]<sup>+</sup> calcd for C<sub>62</sub>H<sub>84</sub>O<sub>10</sub>S, 1020.5800; found 1020.5805

### **Step c: Synthesis of calix[4]arene-crown-5 tethered with (-)-10-camphor sulfonyl catalyst(VI):**

The synthetic procedure is the same as catalyst **V** using (-)-10-camphor sulfonyl chloride; mp 67°C ([α]<sup>28</sup><sub>D</sub> = -34° C2, CHCl<sub>3</sub>). The residue was purified through column chromatography CH<sub>2</sub>Cl<sub>2</sub>/MeOH = 95/5 to 60/40 as eluent to afford **VI** as a white crystalline solid (1.11 g, 74%); [α]<sup>28</sup><sub>D</sub> = -50° (c 1, CHCl<sub>3</sub>); <sup>1</sup>H NMR (500 MHz, Chloroform-*d*) δ 7.29 (s, 1H), 7.07 (s, 4H), 6.75 (s, 4H), 4.60 (m, 1H), 4.37 (d, *J* = 13.0 Hz, 4H), 4.07 (s, 8H), 3.96 (t, *J* = 5.4 Hz, 4H), 3.84 (d, *J* = 5.4 Hz, 4H), 3.29 (d, *J* = 13.1 Hz, 4H), 3.18 (m, 1H), 2.00 (m, 1H), 1.31 (s, 20H), 1.11 (s, 4H), 1.04 (s, 4H), 1.03 (s, 4H), 0.91 (s, 16H). <sup>13</sup>C NMR (126 MHz, Chloroform-*d*) δ 213.73, 213.17, 149.82, 148.82, 145.85, 140.23, 131.511, 126.85, 124.56, 124.35, 124.01, 123.96, 57.66, 57.39,

46.81, 46.70, 46.26, 42.37, 41.49, 32.89, 32.86, 30.88, 30.68, 30.35, 29.97, 18.96, 18.87 HRMS (ESI+)  $m/z$   $[M + H]^+$  calcd for  $C_{62}H_{84}O_{10}S$ , 1020.5800; found 1020.5803

#### Step d: Synthesis of calix[4]arene-crown-5 tethered with (+)-10-camphorsulfonyl catalyst (VII):

To a solution of calix[4]crown-5 II (1.2g, 1.5 mmol) in DryTHF/DMF mixture (16/1), a 60% suspension of sodium hydride in mineral oil was added (0.14g, 6.0 mmol). After stirring the reaction mixture at room temperature for 2 hours, D-(+)-10-camphor sulfonyl chloride (1.50g, 8.0 mmol mp 69°C ( $[\alpha]^{28}_D = +36^\circ$  C2,  $CHCl_3$ )) in THF (2.5 mL) was added. The reaction mixture was stirred at ambient temperature for 5h followed by heating at 70 °C for 12h. Reaction was monitored via TLC. After completion of reaction, reaction mixture was cooled to room temperature and solvent was removed under vacuum and the oily residue was dissolved into chloroform and washed with saturated  $NH_4Cl$  solution. Then the organic layer was dried over  $Na_2SO_4$ . The residue was further purified through column chromatography  $CH_2Cl_2/MeOH = 95/5$  to 60/40 as eluent to afford VII as a white crystalline solid (1.47 g, 80%);  $[\alpha]^{28}_D = +78^\circ$  (c 1,  $CHCl_3$ );  $^1H$  NMR (600 MHz, Chloroform-*d*)  $\delta$  7.07 (s, 4H), 6.75 (s, 4H), 4.38 (d,  $J = 13.0$  Hz, 4H), 4.37-4.25 (m, 2H), 4.10 – 4.06 (m, 4H), 3.96 (d,  $J = 5.4$  Hz, 4H), 3.85 (d,  $J = 5.4$  Hz, 4H), 3.30 (d,  $J = 13.1$  Hz, 4H), 2.83 (s, 2H), 2.17 – 1.90 (m, 2H), 1.78 (s, 4H), 1.34 (s, 2H), 1.31 (s, 20H), 1.21 (s, 4H), 0.94 (s, 4H), 0.91 (s, 16H).  $^{13}C$  NMR (126 MHz, Chloroform-*d*)  $\delta$  214.41, 214.15, 150.82, 149.81, 146.85, 141.22, 132.51, 127.84, 125.44, 124.97, 71.07, 70.90, 70.37, 43.26, 42.82, 42.52, 42.4, 37.12, 34.15, 33.92, 33.89, 33.85, 33.82, 33.06, 31.76, 31.50, 31.35, 31.27, 31.04, 30.99, 29.72, 26.90, 24.93, 22.72, 20.25, 20.25, 19.86, 19.71, 14.14. HRMS (ESI+)  $m/z$   $[M + H]^+$  calcd for  $C_{72}H_{98}O_{13}S_2$  1234.6400; found 1234.6406

### 3. General procedure for one-pot three-component Strecker reaction.

In an inert environment, benzaldehyde (84 mg, 0.8 mmol), aniline (74 mg, 0.8 mmol), trimethylsilyl cyanide (79 mg, 0.8 mmol), and catalyst (2 mol%) were introduced in a dry glass tube with dichloromethane (0.4ml) as a solvent. The reaction mixture was stirred continuously for 15 minutes and monitored through TLC. The reaction mixture was treated with chloroform and washed with a saturated solution of sodium bisulphite. The organic phase was dried over anhydrous sodium sulphate. The solvent was then evaporated under reduced pressure and the crude was purified through column chromatography (hexane/Ethyl acetate 80/20). The enantiomeric excess was determined by chiral stationary-phase HPLC analysis.

**Table S1-Effects of the ratio of aldehyde/amine to TMSCN on enantioselective Strecker reaction\***

| Entry <sup>[a]</sup> | Ratio of benzaldehyde/aniline /TMSCN | Time[ <i>min</i> ] | Yield <sup>[b]</sup> | ee <sup>[c]</sup> |
|----------------------|--------------------------------------|--------------------|----------------------|-------------------|
| 1                    | 1/1/1                                | 15                 | 99.9                 | 99.2              |
| 2                    | 1/0.9/1.2                            | 15                 | 99.9                 | 99.1              |
| 3                    | 1/0.9/1.5                            | 30                 | 99.9                 | 98.9              |

\*Reaction Conditions: 1 equiv of catalyst **V**, benzaldehyde, aniline and TMSCN in DCM at 25°C <sup>[b]</sup> Isolated yield.<sup>[c]</sup>Determined by HPLC analysis on Daicel chiralpak AD-H

**Table S2- Limitation Table for Substrate scope using catalyst **V**\***

| Entry <sup>[a]</sup> | aldehyde        | Time[min] | Yield <sup>[b]</sup> | $[\alpha]^{28}_D$ <sup>[c]</sup> |
|----------------------|-----------------|-----------|----------------------|----------------------------------|
| 1                    | Propionaldehyde | 15        | 90                   | +51 (C 0.5, MeOH)                |
| 2                    | butyraldehyde   | 15        | 94                   | +23 (C 0.5, CHCl <sub>3</sub> )  |
| 3                    | Hexanal         | 15        | 97                   | +46 (C 0.5, CHCl <sub>3</sub> )  |

\*Reaction Conditions: 1 equiv of catalyst **V**, aldehyde, aniline and TMSCN in DCM at 25°C <sup>[b]</sup> Isolated yield.

<sup>[c]</sup> Optical rotation values were measured on a JASCO P-1010 polarimeter at  $\lambda = 589$  nm.

#### 4. Characterisation of Strecker products

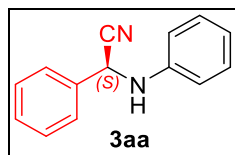

**(S)-2-phenyl-2-(phenylamino)acetonitrile(3aa)**. Colourless solid; 164.3 mg, 99.9% yield; 99.2% ee; determined by HPLC analysis (Daicel Chiralpak AD-H column, hexane/2-propanol = 90/10, flow rate: 1 mL/min, wavelength=210 nm: tR (major) =12.5min, tR (minor) = 18.9 min; <sup>1</sup>H NMR (500 MHz, Chloroform-*d*)  $\delta$  7.61 (dd,  $J = 7.5, 1.9$  Hz, 2H), 7.47 (d,  $J = 7.4$  Hz, 3H), 7.31 – 7.27 (m, 2H), 7.17 (dd,  $J = 8.5, 7.4$  Hz, 1H), 6.96 – 6.88 (m, 1H), 6.82 – 6.77 (m, 2H), 6.73 – 6.69 (m, 1H), 5.44 (s, 1H), 4.00 (s, 1H). <sup>13</sup>C NMR (126 MHz, Chloroform-*d*)  $\delta$  143.62, 132.87, 128.54, 128.51, 128.31, 126.23, 119.24, 113.09, 49.16. HRMS (ESI+)  $m/z$   $[M + H]^+$  calcd for C<sub>14</sub>H<sub>12</sub>N<sub>2</sub>, 208.1000 ; found 208.1009.

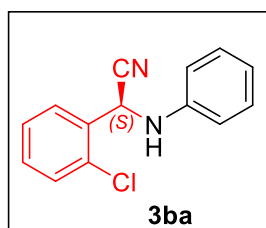

**(S)-2-(2-chlorophenyl)-2-(phenylamino)acetonitrile (3ba)**. Colourless solid; 171.8 mg, 99.9% yield; 89.6% ee; determined by HPLC analysis (Daicel Chiralpak AD-H column, hexane/2-propanol = 90/10, flow rate: 1 mL/min, wavelength=210 nm: tR (major) = 4.1 min, tR (minor) = 7.1 min; <sup>1</sup>H NMR (500 MHz, Chloroform-*d*)  $\delta$  7.41 – 7.35 (m, 5H), 7.31 – 7.28 (m, 4H), 5.75 (s, 1H), 4.07 (s, 1H). <sup>13</sup>C NMR (126 MHz, Chloroform-*d*)  $\delta$  144.39, 135.64, 132.43, 129.65, 128.63, 126.25, 120.60, 117.86, 114.33, 49.69. HRMS (ESI+)  $m/z$   $[M + H]^+$  calcd for C<sub>14</sub>H<sub>11</sub>ClN<sub>2</sub>, 242.0600; found 242.0602.

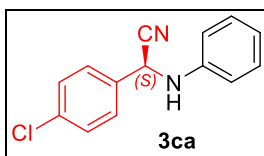

**(S)-2-(4-chlorophenyl)-2-(phenylamino)acetonitrile (3ca).** Colourless solid; 151.4 mg, 92% yield; 88.4% ee; determined by HPLC analysis (Daicel Chiralpak AD-H column, hexane/2-propanol = 90/10, flow rate: 1 mL/min, wavelength=210 nm: tR (major) = 4.2 min, tR (minor) = 4.4 min; <sup>1</sup>H NMR (500 MHz, Chloroform-*d*) δ 7.48 – 7.39 (m, 5H), 7.29 (d, *J* = 7.9 Hz, 1H), 7.24 – 7.20 (m, 2H), 6.93 (t, *J* = 7.4 Hz, 1H), 5.42 (s, 1H), 4.10 (s, 1H). <sup>13</sup>C NMR (126 MHz, Chloroform-*d*) δ 157.92, 150.67, 143.37, 136.41, 133.69, 131.42, 128.98, 128.65, 128.57, 128.23, 128.11, 127.62, 125.24, 119.87, 119.62, 116.82, 113.32, 48.68, 28.73 HRMS (ESI+) *m/z* [M + H]<sup>+</sup> calcd for C<sub>14</sub>H<sub>11</sub>ClN<sub>2</sub>, 242.0600; found 242.0603

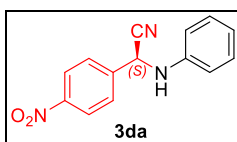

**(S)-2-(4-nitrophenyl)-2-(phenylamino)acetonitrile(3da).** Yellow solid; 207.3 mg, 99.9% yield; 47.0% ee; determined by HPLC analysis (Daicel Chiralpak AD-H column, hexane/2-propanol = 90/10, flow rate: 1 mL/min, wavelength=210 nm: tR (major) = 26.3 min, tR (minor) = 39.3 min; <sup>1</sup>H NMR (500 MHz, Chloroform-*d*) δ 8.30 (d, *J* = 8.7 Hz, 2H), 8.09 – 8.06 (m, 1H), 7.82 (d, *J* = 8.4 Hz, 2H), 7.27 (dd, *J* = 13.4, 6.9 Hz, 3H), 6.94 (t, *J* = 7.4 Hz, 1H), 6.76 (d, *J* = 7.9 Hz, 2H), 5.64 – 5.48 (m, 1H), 4.22 (s, 1H). <sup>13</sup>C NMR (126 MHz, Chloroform-*d*) δ 141.59, 138.75, 129.73, 129.51, 129.43, 129.36, 129.15, 128.68, 128.24, 127.11, 124.49, 124.21, 124.04, 120.98, 120.79, 114.62, 49.76. HRMS (ESI+) *m/z* [M + H]<sup>+</sup> calcd for C<sub>14</sub>H<sub>11</sub>N<sub>3</sub>O<sub>2</sub>, 253.0900; found 253.0907.

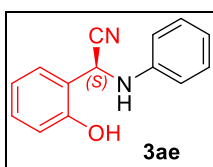

**(S)-2-(2-hydroxyphenyl)-2-(phenylamino)acetonitrile (3ea).** Colourless solid; 157.9 mg, 92% yield; 89.1% ee; determined by HPLC analysis (Daicel Chiralpak AD-H column, hexane/2-propanol = 90/10, flow rate: 1 mL/min, wavelength=210 nm: tR (major) = 8.9 min, tR (minor) = 18.8 min; <sup>1</sup>H NMR (500 MHz, Chloroform-*d*) δ 8.63 (s, 1H), 7.56 (dd, *J* = 7.8, 1.6 Hz, 1H), 7.45 – 7.38 (m, 3H), 7.31 – 7.27 (m, 3H), 7.03 (dd, *J* = 7.7, 3.6 Hz, 3H), 6.92 (d, *J* = 8.0 Hz, 2H), 5.63 (d, *J* = 9.1 Hz, 1H), 4.23 (d, *J* = 9.6 Hz, 1H). <sup>13</sup>C NMR (126 MHz, Chloroform-*d*) δ 161.66, 153.76,

132.15, 131.26, 128.71, 128.40, 127.13, 125.89, 121.23, 120.15, 118.07, 116.30, 115.41, 47.61. HRMS (ESI+)  $m/z$   $[M + H]^+$  calcd for  $C_{14}H_{12}N_2O$ , 224.0900; found 224.0903

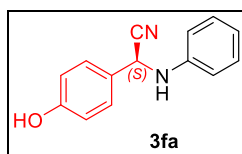

**(S)-2-(4-hydroxyphenyl)-2-(phenylamino)acetonitrile (3fa).** Colourless solid; 171.3 mg, 95% yield; 95.5% ee; determined by HPLC analysis (Daicel Chiralpak AD-H column, hexane/2-propanol = 90/10, flow rate: 1 mL/min, wavelength=210 nm: tR (major) = 26.9 min, tR (minor) = 33.3 min;  $^1H$  NMR (500 MHz, Chloroform-*d*)  $\delta$  7.46 (d,  $J$  = 8.5 Hz, 2H), 7.31 – 7.27 (m, 2H), 6.91 (t,  $J$  = 8.1 Hz, 3H), 6.78 (dt,  $J$  = 7.7, 3.4 Hz, 2H), 5.36 (d,  $J$  = 7.5 Hz, 1H), 4.01 (d,  $J$  = 8.5 Hz, 1H).  $^{13}C$  NMR (126 MHz, Chloroform-*d*)  $\delta$  155.65, 143.66, 128.56, 127.85, 124.99, 119.22, 117.38, 115.13, 113.08, 48.66. HRMS (ESI+)  $m/z$   $[M + H]^+$  calcd for  $C_{14}H_{12}N_2O$ , 224.0900; found 224.0905

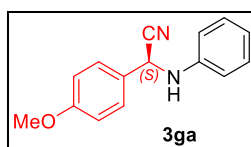

**(S)-2-(4-methoxyphenyl)-2-(phenylamino)acetonitrile (3ga).** Colourless solid; 151.5 mg, 97% yield; 97.9% ee; determined by HPLC analysis (Daicel Chiralpak AD-H column, hexane/2-propanol = 90/10, flow rate: 1 mL/min, wavelength=210 nm: tR (major) = 11.8 min, tR (minor) = 12.5 min;  $^1H$  NMR (500 MHz, Chloroform-*d*)  $\delta$  7.51 (d,  $J$  = 8.7 Hz, 2H), 7.28 (dd,  $J$  = 8.5, 7.3 Hz, 2H), 6.97 (d,  $J$  = 8.7 Hz, 2H), 6.90 (t,  $J$  = 7.4 Hz, 1H), 6.80 – 6.75 (m, 2H), 5.37 (s, 1H), 3.84 (s, 3H).  $^{13}C$  NMR (126 MHz, Chloroform-*d*)  $\delta$  159.38, 143.69, 128.52, 127.60, 124.88, 119.13, 117.39, 113.59, 113.04, 54.39, 48.60. HRMS (ESI+)  $m/z$   $[M + H]^+$  calcd for  $C_{15}H_{14}N_2O$ , 238.1100; found 238.1107.

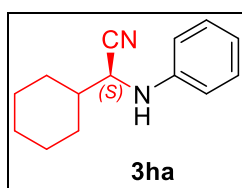

**(S)-2-cyclohexyl-2-(phenylamino)acetonitrile (3ha).** Colourless solid; 141.1 mg, 99.9% yield; 98.5% ee; determined by HPLC analysis (Daicel Chiralpak AD-H column, hexane/2-propanol = 90/10, flow rate: 1 mL/min, wavelength=210 nm: tR (major) = 22.9 min, tR (minor) = 25.6 min;  $^1H$  NMR (500 MHz, Chloroform-*d*)  $\delta$  7.29 – 7.27 (m, 2H), 7.20 – 7.17 (m, 1H), 6.90 – 6.87 (m, 1H), 6.73 (ddt,  $J$  = 11.0, 8.5, 1.1 Hz, 3H), 3.88 – 3.79 (m, 1H), 1.36 – 1.21 (m, 12H).  $^{13}C$  NMR (126 MHz, Chloroform-*d*)  $\delta$  145.19, 129.55, 119.89, 118.86, 114.06, 51.75, 40.80, 29.69, 28.94, 25.94, 25.66, 25.59. HRMS (ESI+)  $m/z$   $[M + H]^+$  calcd for  $C_{14}H_{18}N_2$ , 214.1500; found 214.1504

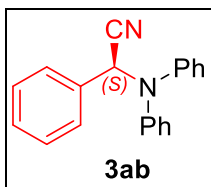

**(S)-2-(diphenylamino)-2-phenylacetonitrile (3ab).** Colourless solid; 217.1 mg, 98% yield; 93.1% ee; determined by HPLC analysis (Daicel Chiralpak AD-H column, hexane/2-propanol = 90/10, flow rate: 1 mL/min, wavelength=210 nm: tR (major) = 18.8 min, tR (minor) = 34.2 min; <sup>1</sup>H NMR (500 MHz, CDCl<sub>3</sub>) δ 7.53 – 7.50 (m, 2H), 7.43 (s, 3H), 7.07 (d, *J* = 7.9 Hz, 9H), 6.93 (d, *J* = 7.4 Hz, 5H), 5.50 (s, 1H). <sup>13</sup>C NMR (126 MHz, CDCl<sub>3</sub>) δ 143.19, 135.38, 129.41, 126.81, 126.63, 121.12, 121.11, 121.01, 118.89, 117.88, 63.76. HRMS (ESI+) *m/z* [M + H]<sup>+</sup> calcd for C<sub>20</sub>H<sub>16</sub>N<sub>2</sub>, 284.1300; found 284.1308.

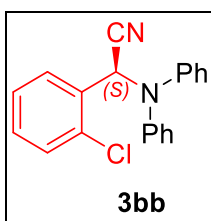

**(S)-2-(2-chlorophenyl)-2-(diphenylamino)acetonitrile (3bb).** Colourless solid; 225.8 mg, 99.9% yield; 95.5% ee; determined by HPLC analysis (Daicel Chiralpak AD-H column, hexane/2-propanol = 90/10, flow rate: 1 mL/min, wavelength=210 nm: tR (major) = 9.1 min, tR (minor) = 19.1 min; <sup>1</sup>H NMR (500 MHz, Chloroform-*d*) δ 7.30 (t, *J* = 7.8 Hz, 6H), 7.10 (d, *J* = 8.0 Hz, 6H), 6.96 (t, *J* = 7.4 Hz, 3H), 5.85 (d, *J* = 4.6 Hz, 1H). <sup>13</sup>C NMR (126 MHz, Chloroform-*d*) δ 144.17, 142.09, 130.13, 130.03, 129.59, 129.10, 128.85, 128.31, 127.41, 126.69, 125.78, 122.95, 121.98, 119.97, 116.78, 59.99. HRMS (ESI+) *m/z* [M + H]<sup>+</sup> calcd for C<sub>20</sub>H<sub>15</sub>ClN<sub>2</sub>, 318.0900; found 318.0902.

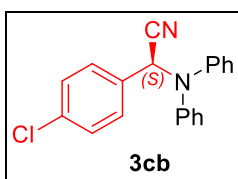

**(S)-2-(4-chlorophenyl)-2-(diphenylamino)acetonitrile (3cb).** Colourless solid; 209.8 mg, 97% yield; 98.4% ee; determined by HPLC analysis (Daicel Chiralpak AD-H column, hexane/2-propanol = 90/10, flow rate: 1 mL/min, wavelength=210 nm: tR (major) = 17.2 min, tR (minor) = 22.4 min; <sup>1</sup>H NMR (500 MHz, CDCl<sub>3</sub>) δ 7.07 (d, *J* = 7.9 Hz, 9H), 6.92 (t, *J* = 7.4 Hz, 5H), 5.51 (s, 1H). <sup>13</sup>C NMR (126 MHz, Chloroform-*d*) δ 143.12, 133.73, 131.09, 129.38, 127.98, 121.09, 120.97, 118.38, 117.81, 63.08. HRMS (ESI+) *m/z* [M + H]<sup>+</sup> calcd for C<sub>20</sub>H<sub>15</sub>ClN<sub>2</sub>, 318.0900; found 318.0909.



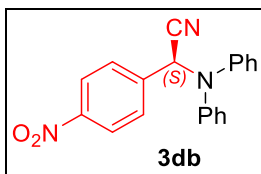

**(S)-2-(diphenylamino)-2-(4-nitrophenyl)acetonitrile (3db).** yellow solid; 248.1 mg, 92% yield; 66.4 % ee; determined by HPLC analysis (Daicel Chiralpak AD-H column, hexane/2-propanol = 90/10, flow rate: 1 mL/min, wavelength=210 nm: tR (major) =17.0 min, tR (minor) = 18.6 min;  $^1\text{H}$  NMR (500 MHz, Chloroform-*d*)  $\delta$  8.33 (d,  $J$  = 8.8 Hz, 1H), 7.80 – 7.73 (m, 2H), 7.29 (s, 1H), 7.28 (d,  $J$  = 1.2 Hz, 2H), 7.27 (s, 3H), 7.11 – 7.06 (m, 4H), 6.94 (s, 2H), 5.71 (s, 1H).  $^{13}\text{C}$  NMR (126 MHz, Chloroform-*d*)  $\delta$  143.13, 141.44, 129.36, 127.51, 124.37, 121.03, 117.83, 62.54. HRMS (ESI+)  $m/z$   $[\text{M} + \text{H}]^+$  calcd for  $\text{C}_{20}\text{H}_{15}\text{N}_3\text{O}$ , 329.1200; found 329.1204.

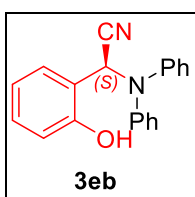

**(S)-2-(diphenylamino)-2-(2-hydroxyphenyl)acetonitrile (3eb).** Colourless solid; 218.4 mg, 95% yield; 98% ee; determined by HPLC analysis (Daicel Chiralpak AD-H column, hexane/2-propanol = 90/10, flow rate: 1 mL/min, wavelength=210 nm: tR (major) =18.1 min, tR (minor) = 20.8 min;  $^1\text{H}$  NMR (500 MHz, Chloroform-*d*)  $\delta$  7.52 – 7.48 (m, 1H), 7.27 (d,  $J$  = 7.8 Hz, 4H), 7.08 (d,  $J$  = 7.9 Hz, 7H), 6.94 (t,  $J$  = 7.4 Hz, 3H), 5.70 (s, 1H).  $^{13}\text{C}$  NMR (126 MHz, Chloroform-*d*)  $\delta$  163.07, 141.56, 130.46, 128.39, 127.77, 126.75, 119.42, 116.24, 112.97, 112.76, 61.82, 54.03. HRMS (ESI+)  $m/z$   $[\text{M} + \text{H}]^+$  calcd for  $\text{C}_{20}\text{H}_{16}\text{N}_2\text{O}$ , 300.1300; found 300.1304.

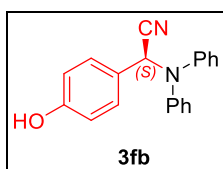

**(S)-2-(diphenylamino)-2-(4-hydroxyphenyl)acetonitrile (3fb)** Colourless solid; 241.3 mg, 99.9% yield; 94.6% ee; determined by HPLC analysis (Daicel Chiralpak AD-H column, hexane/2-propanol = 90/10, flow rate: 1 mL/min, wavelength=210 nm: tR (major) = 18.8 min, tR (minor) =28.3 min;  $^1\text{H}$  NMR (500 MHz, Chloroform-*d*)  $\delta$  7.81 (d,  $J$  = 8.2 Hz, 1H), 7.28 (t,  $J$  = 7.8 Hz, 5H), 7.08 (d,  $J$  = 8.0 Hz, 5H), 6.95 (q,  $J$  = 8.0 Hz, 3H), 5.73 (s, 1H);  $^{13}\text{C}$  NMR (126 MHz, Chloroform-*d*) 163.59, 142.07, 131.00, 128.91, 128.31, 127.29, 119.95, 116.75, 113.50, 113.29, 62.36 HRMS (ESI+)  $m/z$   $[\text{M} + \text{H}]^+$  calcd for  $\text{C}_{20}\text{H}_{16}\text{N}_2\text{O}$ , 300.1300; found 300.1305.

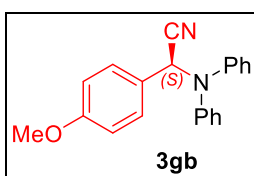

**(S)-2-(diphenylamino)-2-(4-methoxyphenyl)acetonitrile (3gb).** Colourless solid; 189.5 mg, 92% yield; 96.2% ee; determined by HPLC analysis (Daicel Chiralpak AD-H column, hexane/2-propanol = 90/10, flow rate: 1 mL/min, wavelength=210 nm: tR (major) =5.0 min, tR (minor) = 5.6 min; <sup>1</sup>H NMR (500 MHz, Chloroform-*d*) δ 7.30 – 7.26 (m, 4H), 7.11 – 7.07 (m, 6H), 7.02 (d, *J* = 8.8 Hz, 2H), 6.96 – 6.90 (m, 3H), 5.76 (s, 1H), 3.90 (s, 3H). <sup>13</sup>C NMR (126 MHz, Chloroform-*d*) δ 163.59, 142.07, 131.00, 128.31, 127.29, 119.95, 116.75, 113.50, 113.29, 62.36, 54.56. HRMS (ESI+) *m/z* [M + H]<sup>+</sup> calcd for C<sub>21</sub>H<sub>18</sub>N<sub>2</sub>O, 314.1400; found 314.1402.

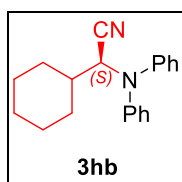

**(S)-2-cyclohexyl-2-(diphenylamino)acetonitrile (3hb).** Colourless solid; 176.1 mg, 92% yield; 96.1% ee; determined by HPLC analysis (Daicel Chiralpak AD-H column, hexane/2-propanol = 90/10, flow rate: 1 mL/min, wavelength=210 nm: tR (major) = 9.5 min, tR (minor) = 13.0 min; <sup>1</sup>H NMR (500 MHz, Chloroform-*d*) δ 7.28 (d, *J* = 7.8 Hz, 3H), 7.08 (d, *J* = 7.9 Hz, 5H), 6.93 (t, *J* = 7.4 Hz, 2H), 4.27 (d, *J* = 6.2 Hz, 1H), 1.89 (s, 1H), 1.85 – 1.80 (m, 2H), 1.75 – 1.70 (m, 3H), 1.27 (q, *J* = 5.0 Hz, 5H). <sup>13</sup>C NMR (126 MHz, Chloroform-*d*) δ 141.55, 127.77, 119.43, 116.24, 64.84, 40.72, 26.52, 26.20, 24.35, 23.87, 23.84. HRMS (ESI+) *m/z* [M + H]<sup>+</sup> calcd for C<sub>20</sub>H<sub>22</sub>N<sub>2</sub>, 290.1800; found 290.1800.

## 5. Procedure for the Synthesis of S-Clopidogrel\*

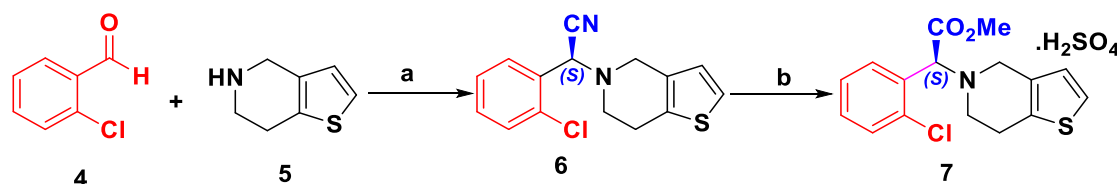

\*Reaction Conditions (a) **4** (3 g, 21mmol), **5** (2.9 g, 21 mmol), TMSCN (2.0 g, 21 mmol) DCM (20 ml) to give **6** (98% yield, 99.3% ee) ;(b) MeOH, H<sub>2</sub>SO<sub>4</sub> to give **7** (73.2% yield, 98.5% ee) ;(c) % ee determined by HPLC equipped with AD-H chiral columns and configuration was determined by relative retention time and specific rotation with literature data

In an inert environment 2-Chlorobenzaldehyde (3 g, 21mmol), 4,5,6,7-tetrahydrothieno[3,2-c]pyridine (2.9 g, 21 mmol) TMSCN (2.0 g, 21 mmol), were introduced in a round bottom flask with dichloromethane (20 ml) as a solvent and catalyst V (0.2 mol%) The reaction mixture was stirred continuously for 15 minutes and monitored through TLC. The reaction mixture was treated with chloroform and washed with a saturated solution of sodium bisulphite. The organic phase was dried over anhydrous sodium sulphate. The solvent was then evaporated under reduced pressure and the crude was purified through column chromatography (n-hexane/ethyl acetate 80:20) to give (S)-2-(2-chlorophenyl)-2-(6,7-dihydrothieno[3,2-c]pyridin-5(4H)-yl)acetonitrile (5.9 g, 98% yield). To this compound **6** esterification was done with MeOH (40 ml), and H<sub>2</sub>SO<sub>4</sub> (1 ml) and the reaction was continued for 4 days and monitored through TLC. The reaction mixture was treated with water followed by the addition of sodium

carbonate and dichloromethane. After drying over Na<sub>2</sub>SO<sub>4</sub> solvent was evaporated to obtain S-Clopidogrel (4.8 g, 73.2% yield). The enantiomeric excess was determined by chiral stationary-phase HPLC analysis using AD-H chiral column.

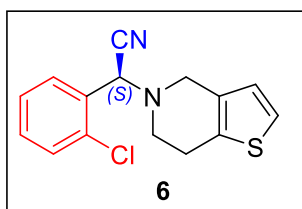

**(S)-2-(2-chlorophenyl)-2-(6,7-dihydrothieno[3,2-c]pyridin-5(4H)-yl)acetonitrile(6):**

colourless solid 5.9 g, 98% yield; 99.3% ee determined by HPLC analysis (Daicel Chiralpak AD-H column, hexane/2-propanol = 60/40, flow rate: 1 mL/min, wavelength=210 nm : t<sub>R</sub> (major) = 10.6 min, t<sub>R</sub> (minor) = 12.2 min; <sup>1</sup>H NMR (500 MHz, Chloroform-*d*) δ 7.71 (s, 1H), 7.48 – 7.33 (m, 3H), 7.09 (d, *J* = 5.2 Hz, 1H), 6.71 (d, *J* = 5.2 Hz, 1H), 5.33 (s, 1H), 3.81 (d, *J* = 13.7 Hz, 1H), 3.67 (d, *J* = 13.7 Hz, 1H), 3.03 – 2.90 (m, 3H), 2.86 (s, 1H). <sup>13</sup>C NMR (126 MHz, Chloroform-*d*) δ 133.06, 131.36, 130.95, 129.02, 128.96, 128.47, 125.29, 123.51, 121.57, 113.65, 57.69, 47.88, 46.24, 24.04. HRMS (ESI+) *m/z* [M + H]<sup>+</sup> calcd for C<sub>15</sub>H<sub>13</sub>ClN<sub>2</sub>S, 288.0500; found. 288.0502

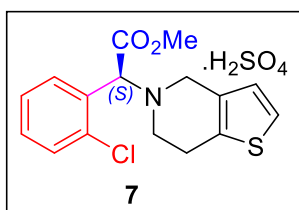

**methyl(S)-2-(2-chlorophenyl)-2-(6,7-dihydrothieno[3,2-c]pyridin-5(4H)-yl)acetate(7):**

colourless solid 4.8 g, 73.2% yield; 98.5% ee determined by HPLC analysis (Daicel Chiralpak AD-H column, hexane/2-propanol = 60/40, flow rate: 1 mL/min, wavelength=210 nm : t<sub>R</sub> (major) = 12.3 min, t<sub>R</sub> (minor) = 13.7 min; <sup>1</sup>H NMR (500 MHz, Chloroform-*d*) δ 7.70 (dd, *J* = 7.3, 2.2 Hz, 1H), 7.41 (dd, *J* = 7.4, 1.9 Hz, 1H), 7.30 (d, *J* = 1.8 Hz, 1H), 7.28 (d, *J* = 2.3 Hz, 1H), 7.06 (d, *J* = 5.2 Hz, 1H), 6.67 (d, *J* = 5.2 Hz, 1H), 4.92 (s, 1H), 3.76 (d, *J* = 14.0 Hz, 1H), 3.73 (s, 3H), 3.63 (d, *J* = 14.1 Hz, 1H), 2.88 (s, 4H). <sup>13</sup>C NMR (126 MHz, Chloroform-*d*) δ 129.98, 129.82, 129.46, 127.21, 125.27, 122.78, 67.90, 52.24, 50.74, 48.34, 29.73, 25.53. HRMS (ESI+) *m/z* [M + H]<sup>+</sup> calcd for C<sub>16</sub>H<sub>16</sub>ClN<sub>2</sub>S, 321.0600; found 321.0608

## 6. Recyclability Test (under scale-up condition)

The reaction was performed in a 250 mL round bottom flask at 25 °C in an inert environment, benzaldehyde **1a** (8.4 g, 80 mmol), aniline **2a** (7.4 g, 80 mmol), trimethylsilyl cyanide (7.9 g, 80 mmol), and catalyst **V** (0.2 mol%) were introduced in a dry glass tube with dichloromethane (120 ml) as a solvent. The reaction mixture was stirred continuously for 15 minutes and monitored through TLC. After completion of reaction, solvent was removed *in-vacuo*. The reaction mixture was dissolved in cold diethyl ether (100x3 times) and organic layer was

washed with saturated solution of sodium bisulphite. The organic phase was dried over anhydrous sodium sulphate. The solvent was then evaporated under reduced pressure to afford 3aa (16.4g; 99.2% yield). For the next cycle, in the same flask (containing catalyst), 120 mL dichloromethane was charged and stirred for 15 min, followed by subsequent catalytic cycles under similar conditions as described above.

## 7. Time-dependent NMR:

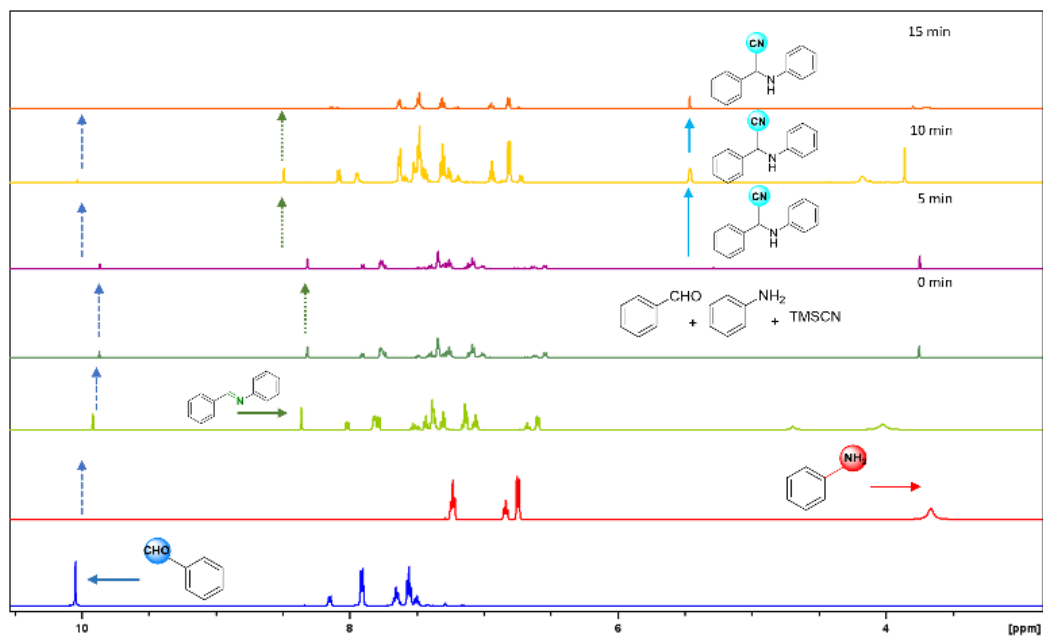

Figure 1

In Figure S1 The time dependent NMR showed the formation of imine intermediate and it was ascertained by the downfield value of chemical shift i.e. 8.91 ppm. As the reaction progresses the  $\alpha$ -aminonitrile moiety starts forming as the upfield value of 5.02 ppm of Hydrogen attached to quaternary carbon of  $\alpha$ -aminonitrile starts appearing. Within the due course of time eventually, the chemical shift value of the imine intermediate and aldehyde would disappear completely within 15 minutes of time

## 8. IR and UV-visible spectroscopic study-

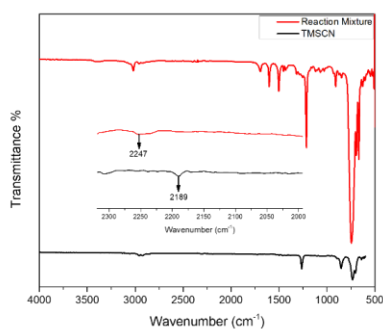

Figure 2

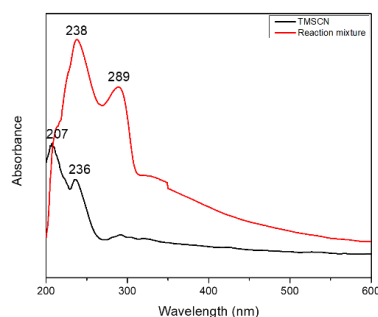

Figure 3

In figure S2: IR spectrum, the peak intensities at  $1697\text{cm}^{-1}$ (CO),  $2189\text{cm}^{-1}$  (CN) for aldehyde and TMSCN respectively were diminished in the cyanated product. The characteristic peaks at  $3021\text{cm}^{-1}$  (N-H) and  $2247\text{cm}^{-1}$  (CN) indicate the formation of the  $\alpha$ -aminonitrile moiety.

In **Figure S3**: of the UV absorbance spectrum, TMSCN shows a low-intensity band at 207 nm and a high-intensity band at 236 nm due to  $n-\pi^*$  and  $\pi-\pi^*$  transition respectively. In a similar way, the formation of  $\alpha$ -aminonitrile moiety was confirmed by the shift in  $n-\pi^*$  (238 nm) and  $\pi-\pi^*$  transition (289 nm). The shift in absorbance maxima is due to the presence of a benzene chromophore.

## 9. $^{29}\text{Si}$ -NMR

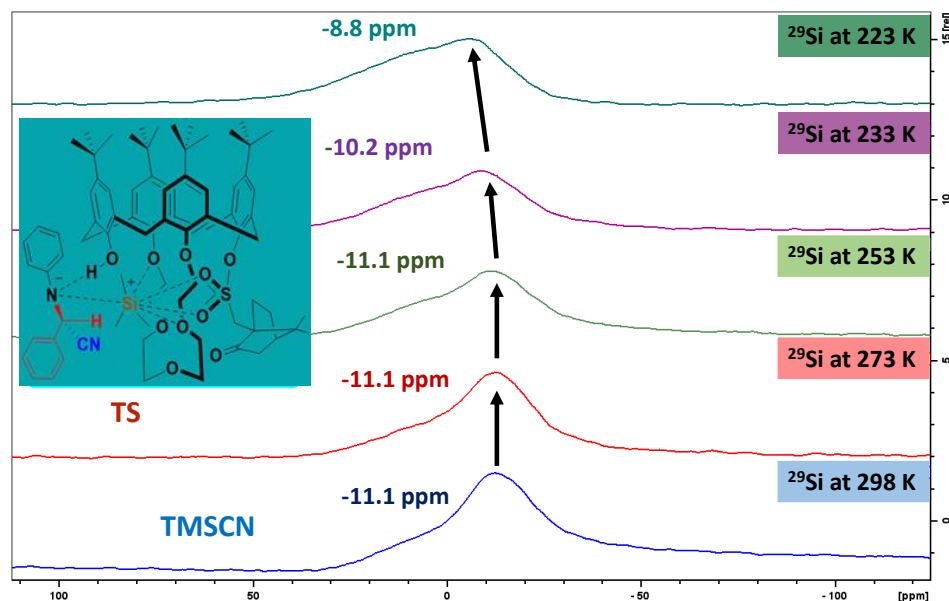

**Figure S4:**  $^{29}\text{Si}$ (500MHz) analysis was carried out at a temperature range of rt to  $-50\text{ }^\circ\text{C}$ . All experiments were performed in  $\text{CDCl}_3$ .  $^{29}\text{Si}$ -NMR Spectra were recorded and scaled from  $\text{TMS}^2$

## 10. HRMS

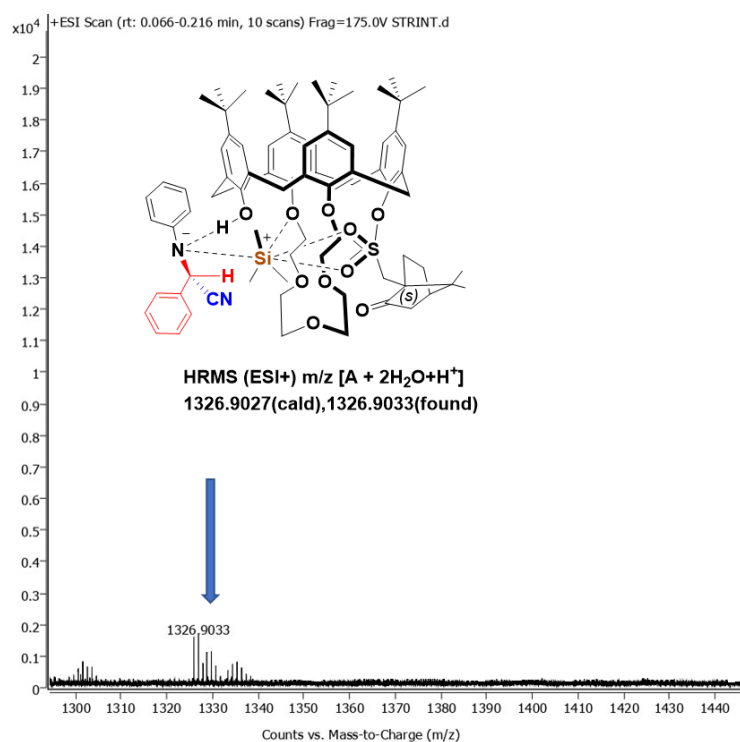

**Figure S5:** ESI-MS analysis of Transition state

# 11. NMR (Catalyst-V)

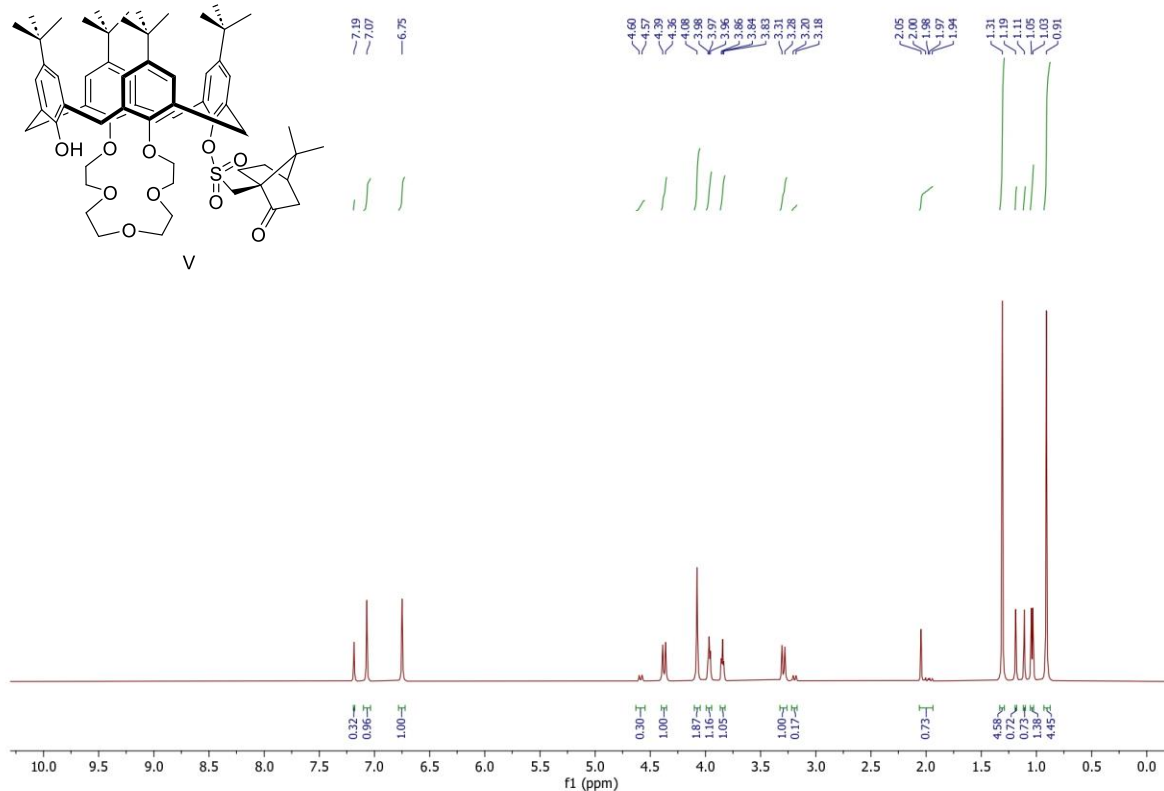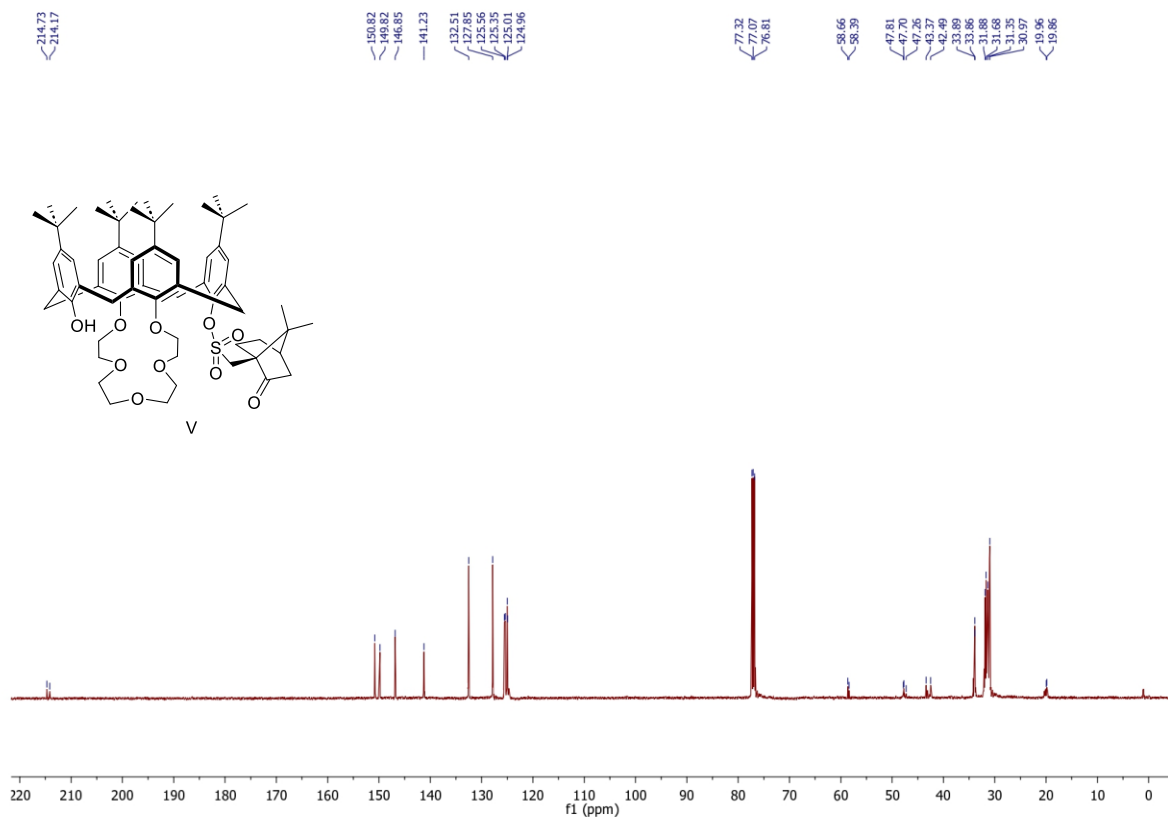

# Catalyst-VI

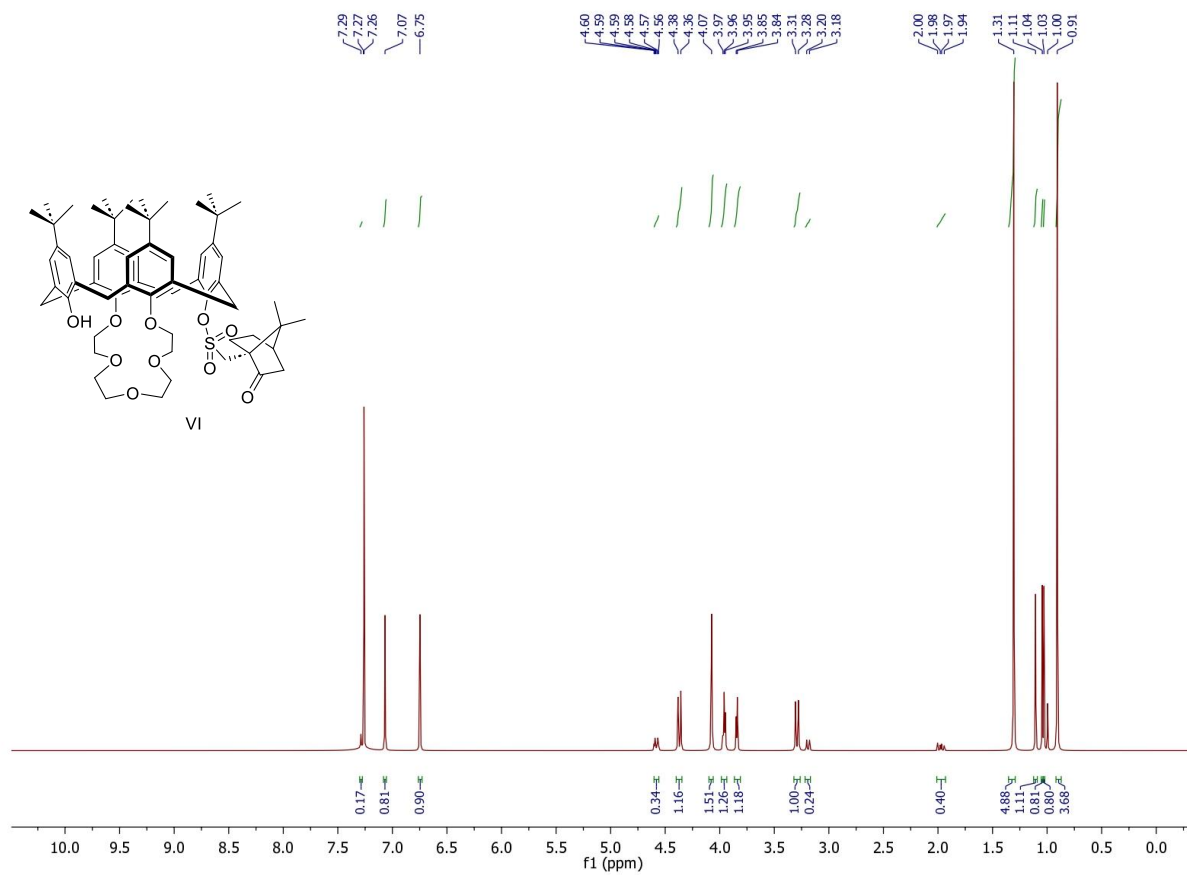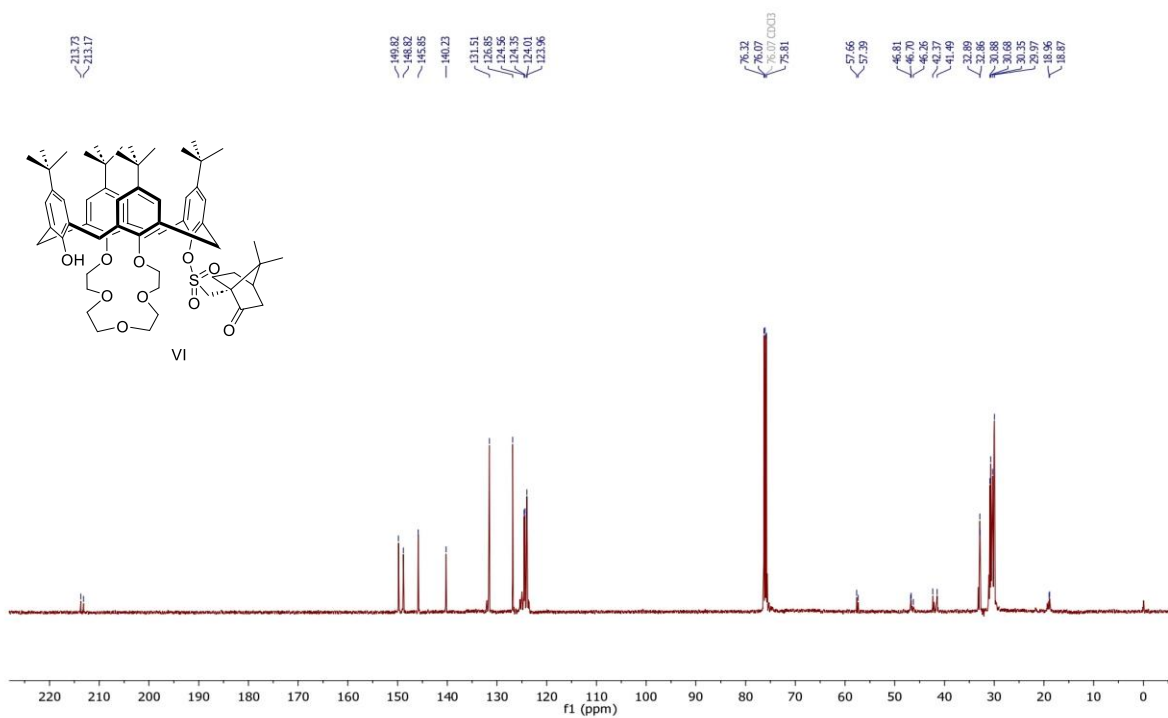

# Catalyst VII

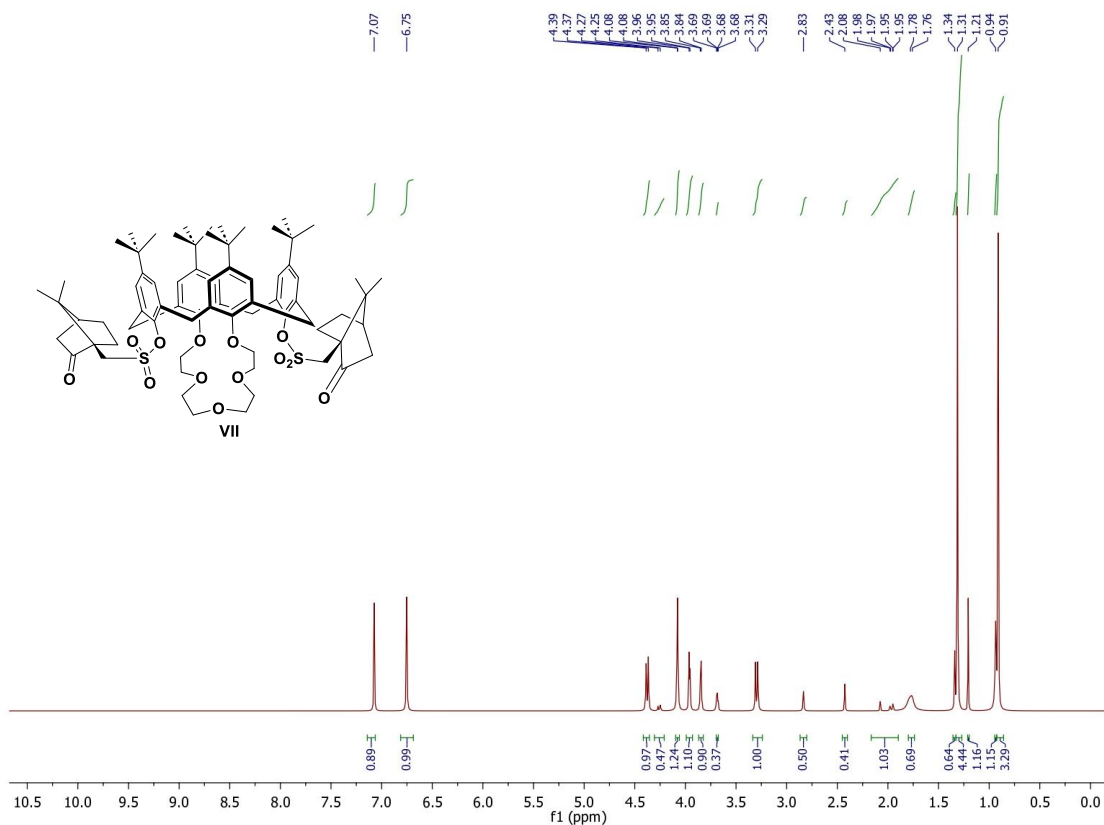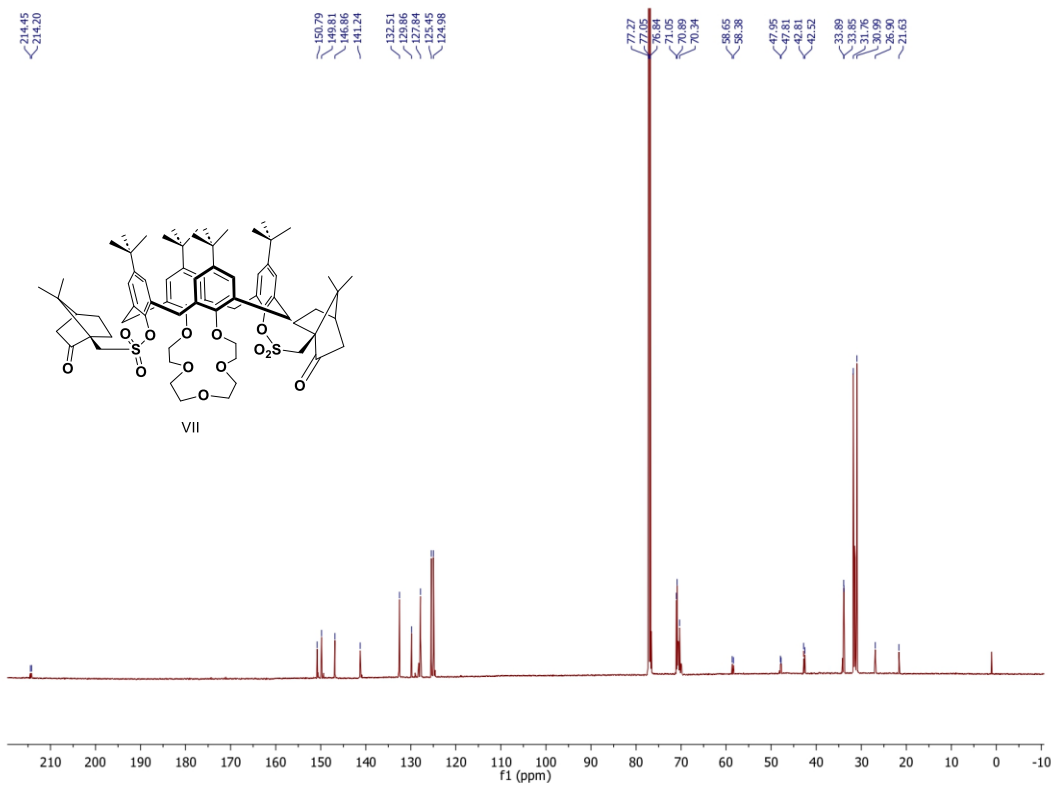



3aa

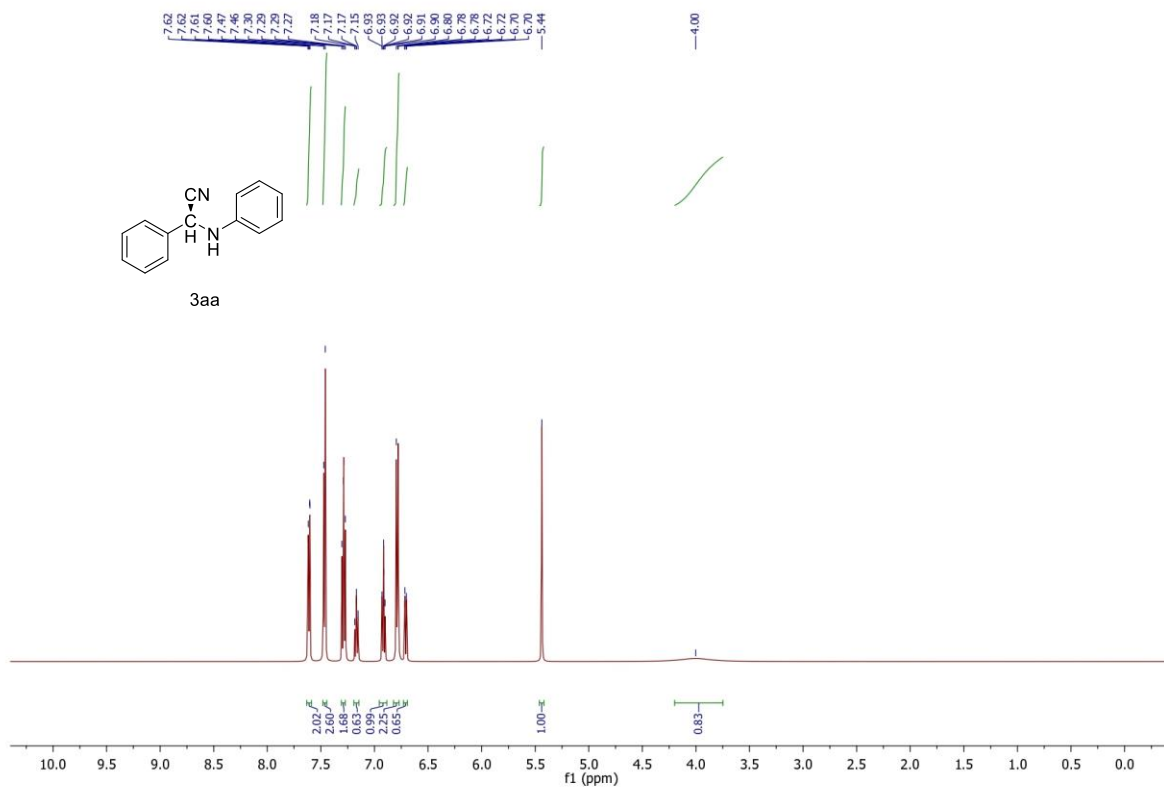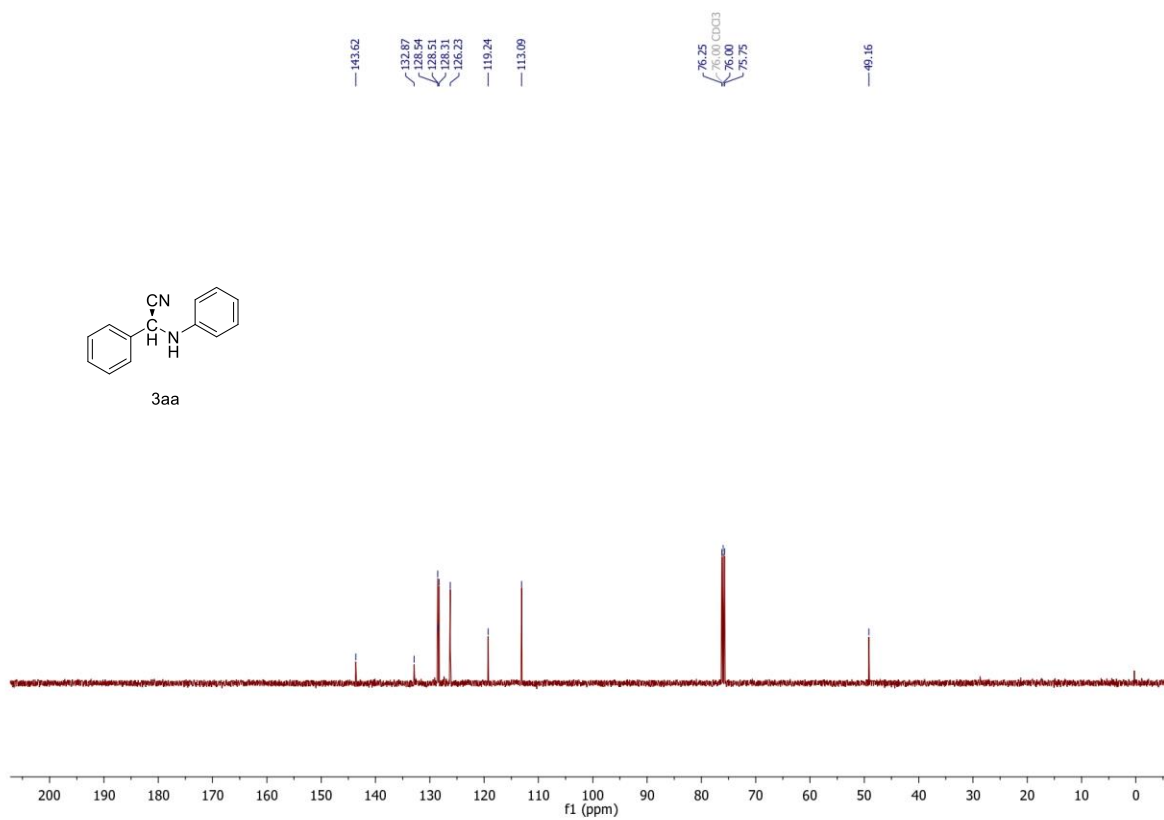

### 3ba

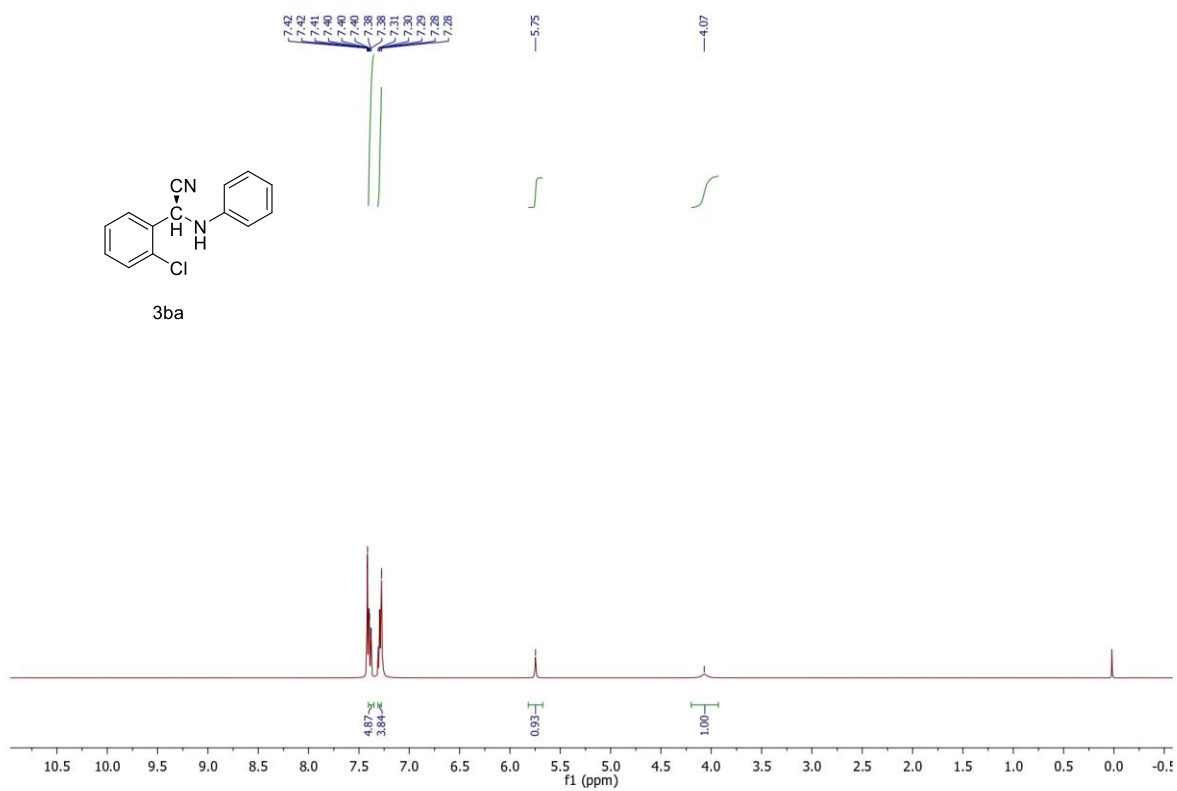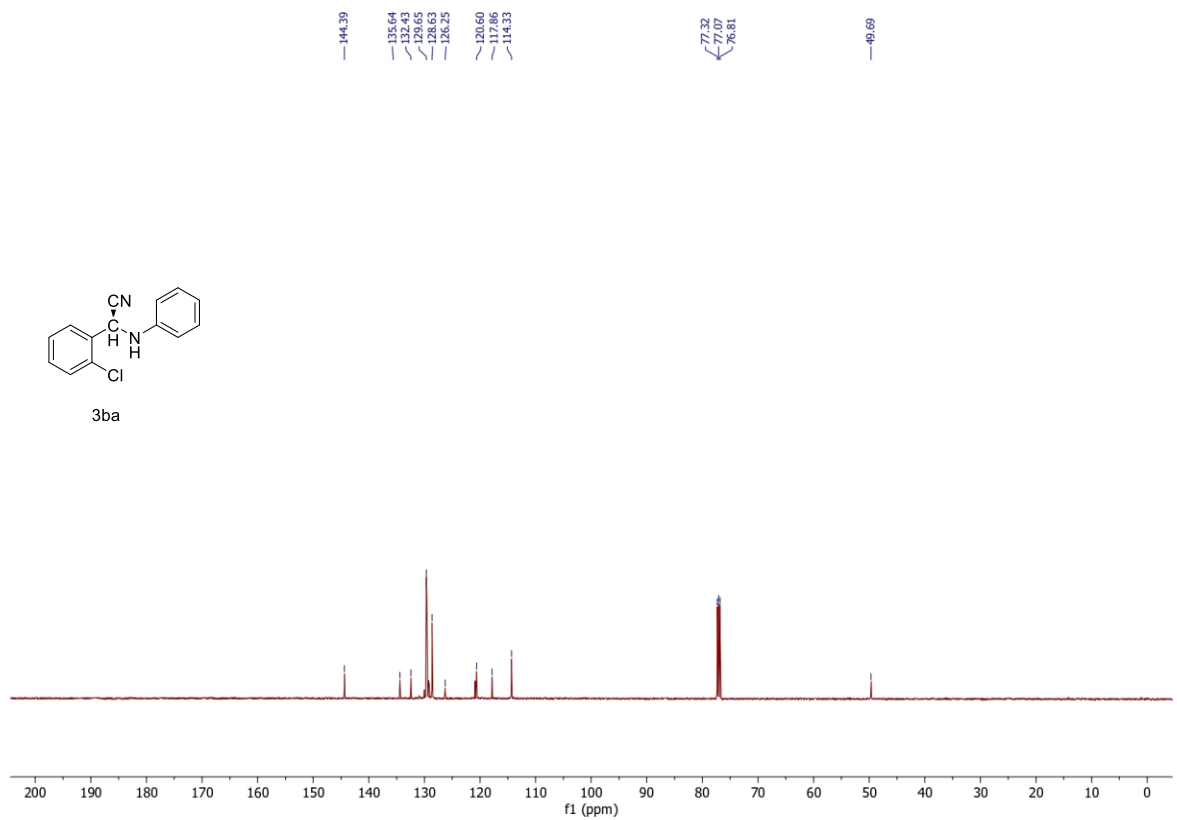

3ca

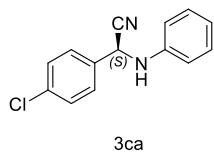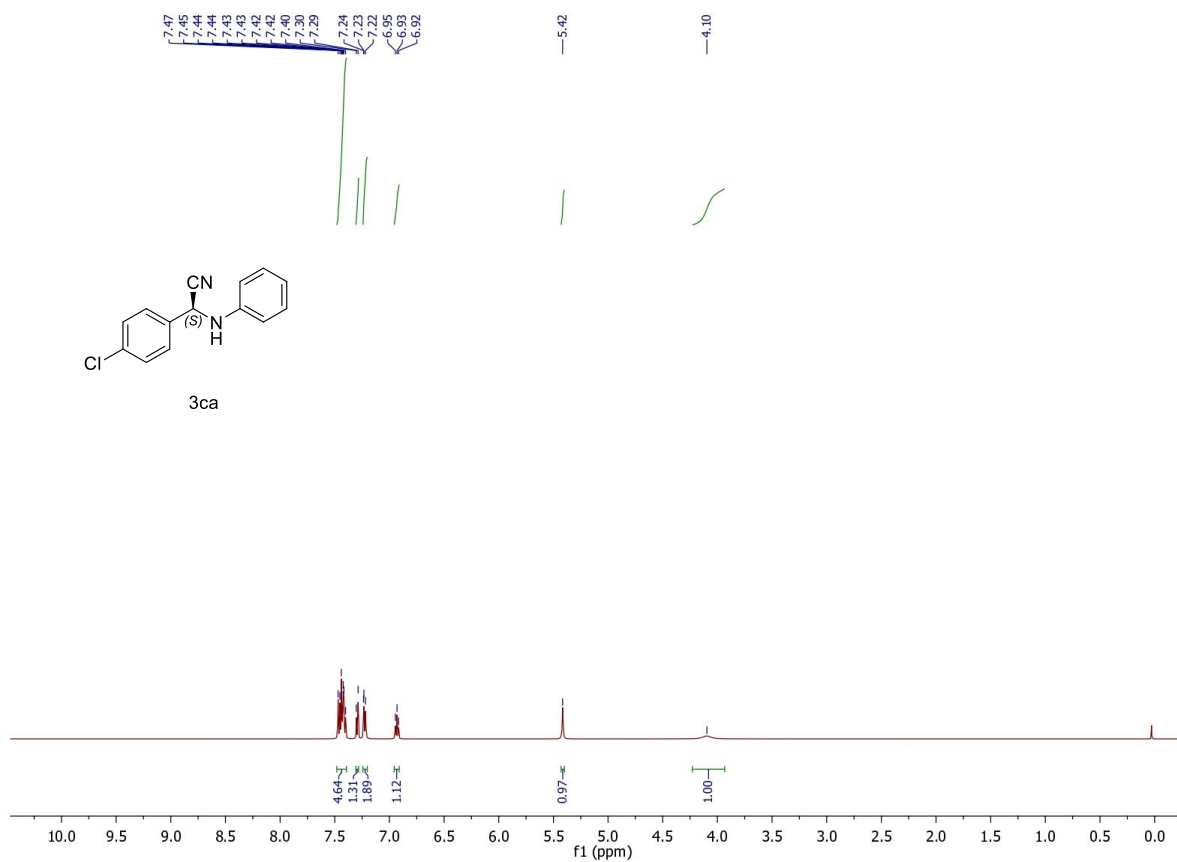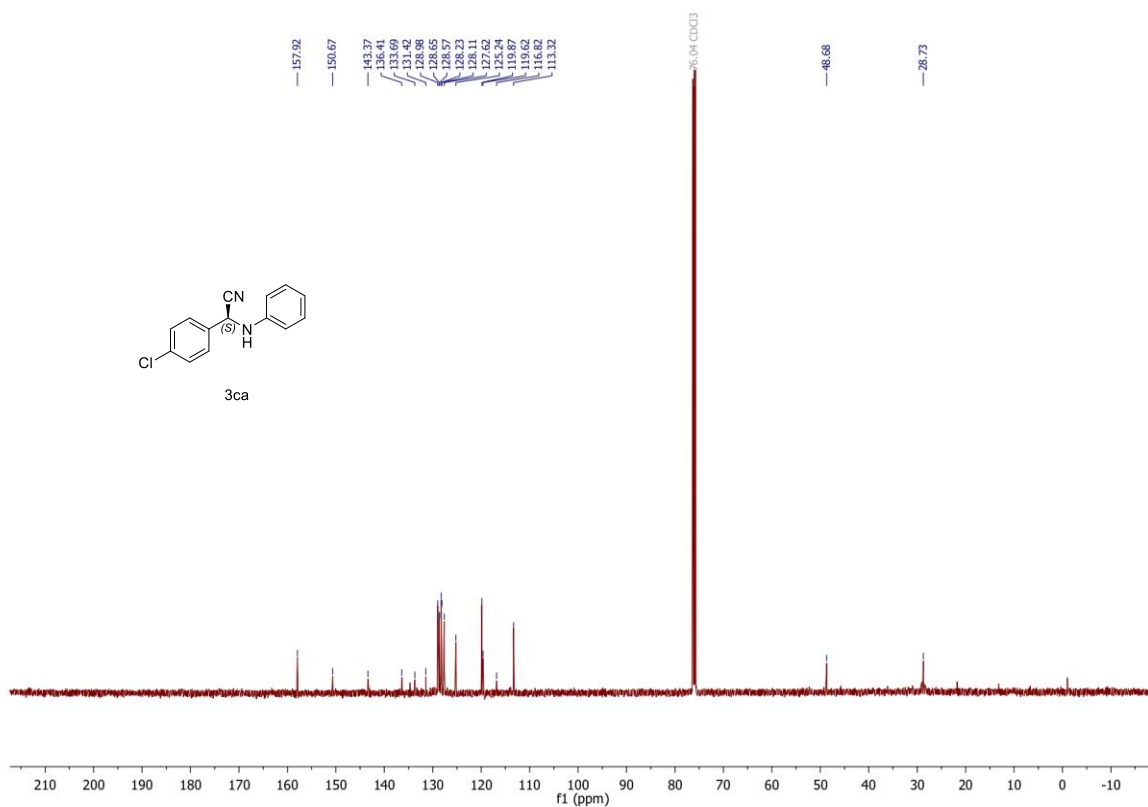

3da

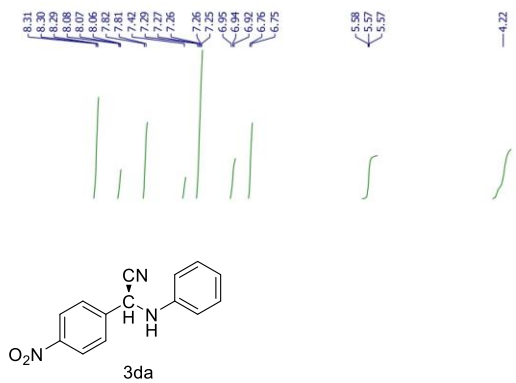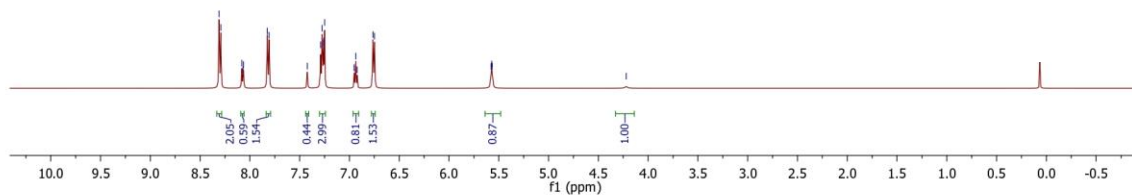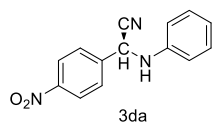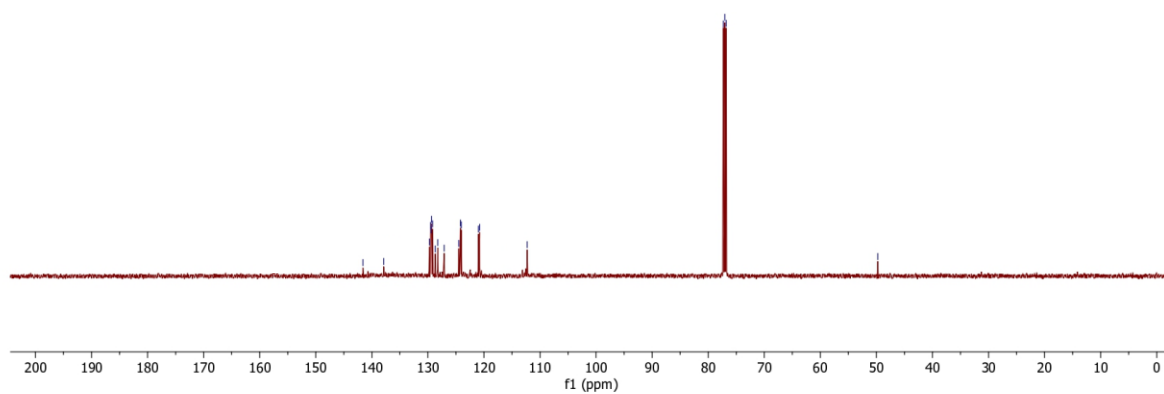

3ea

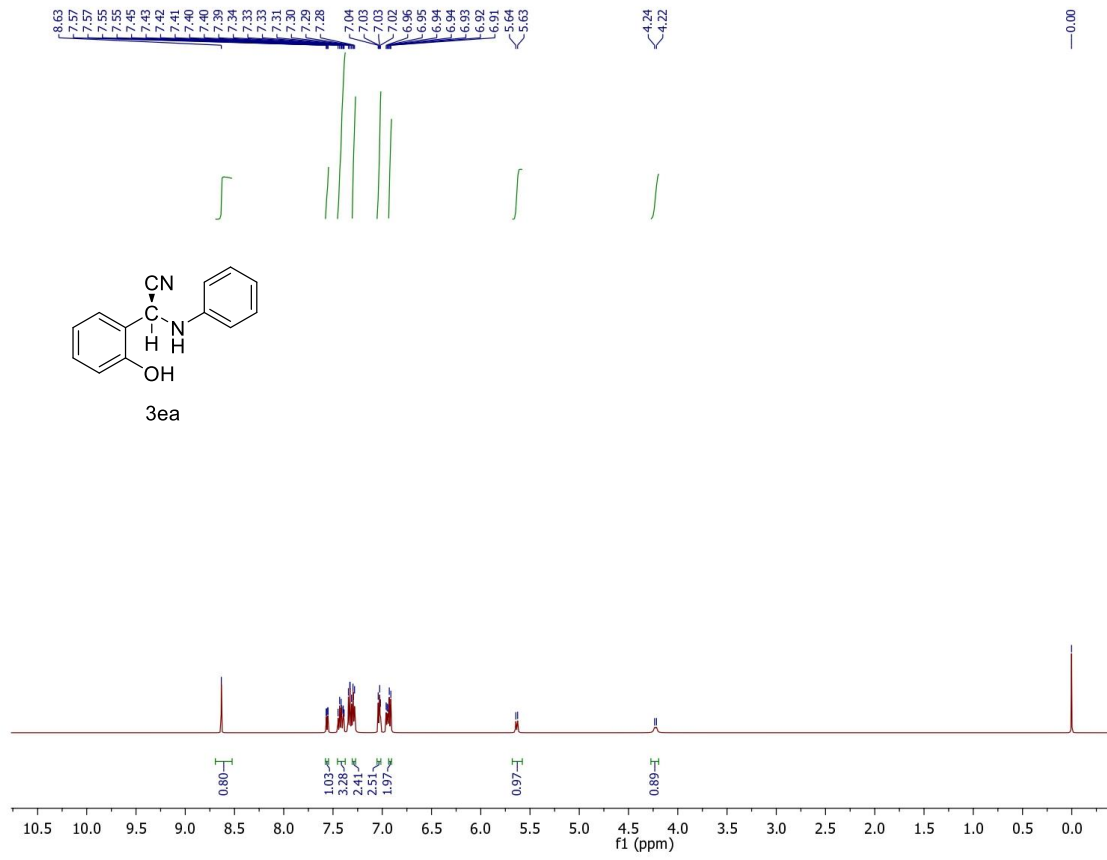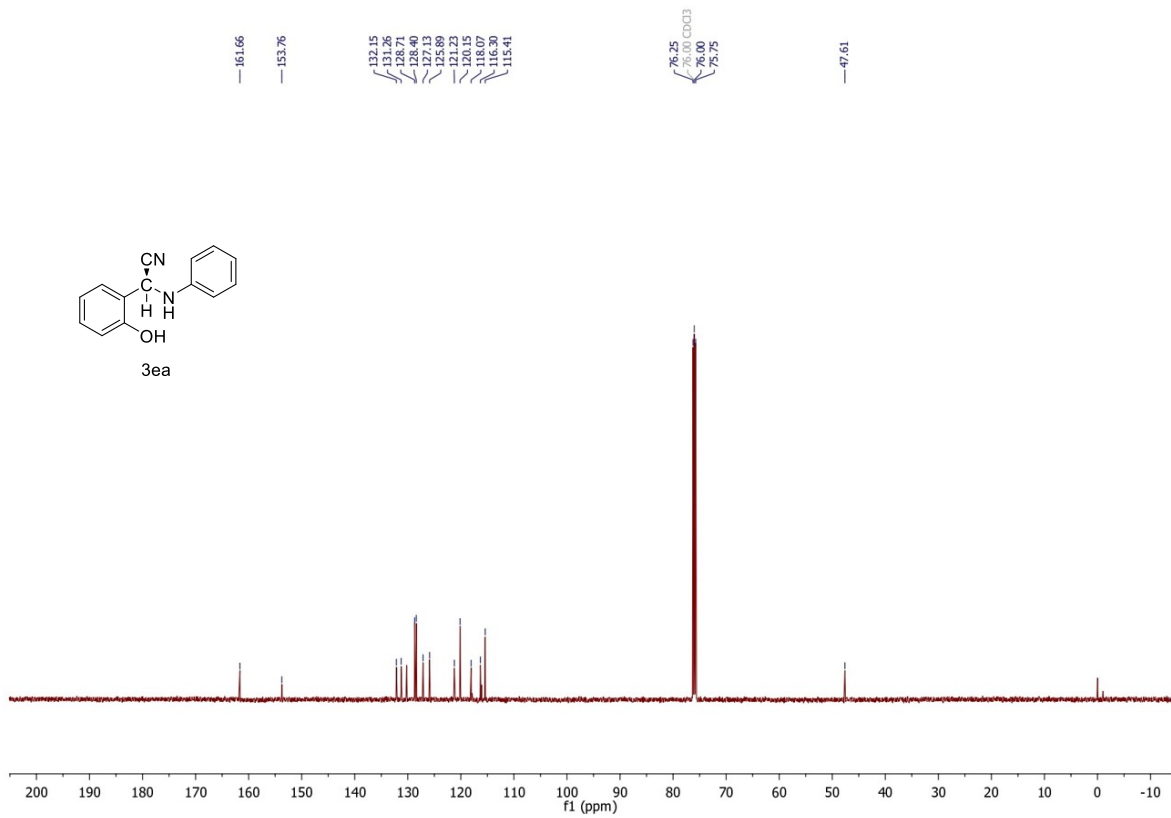

3fa

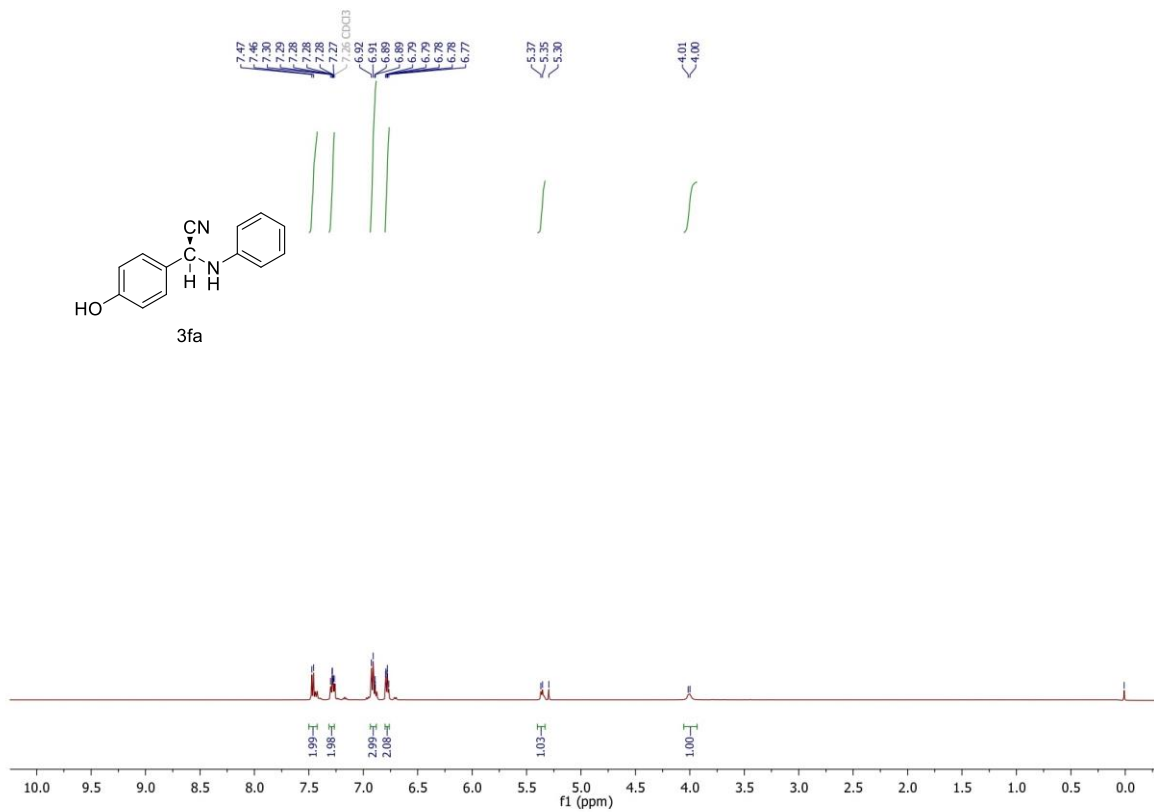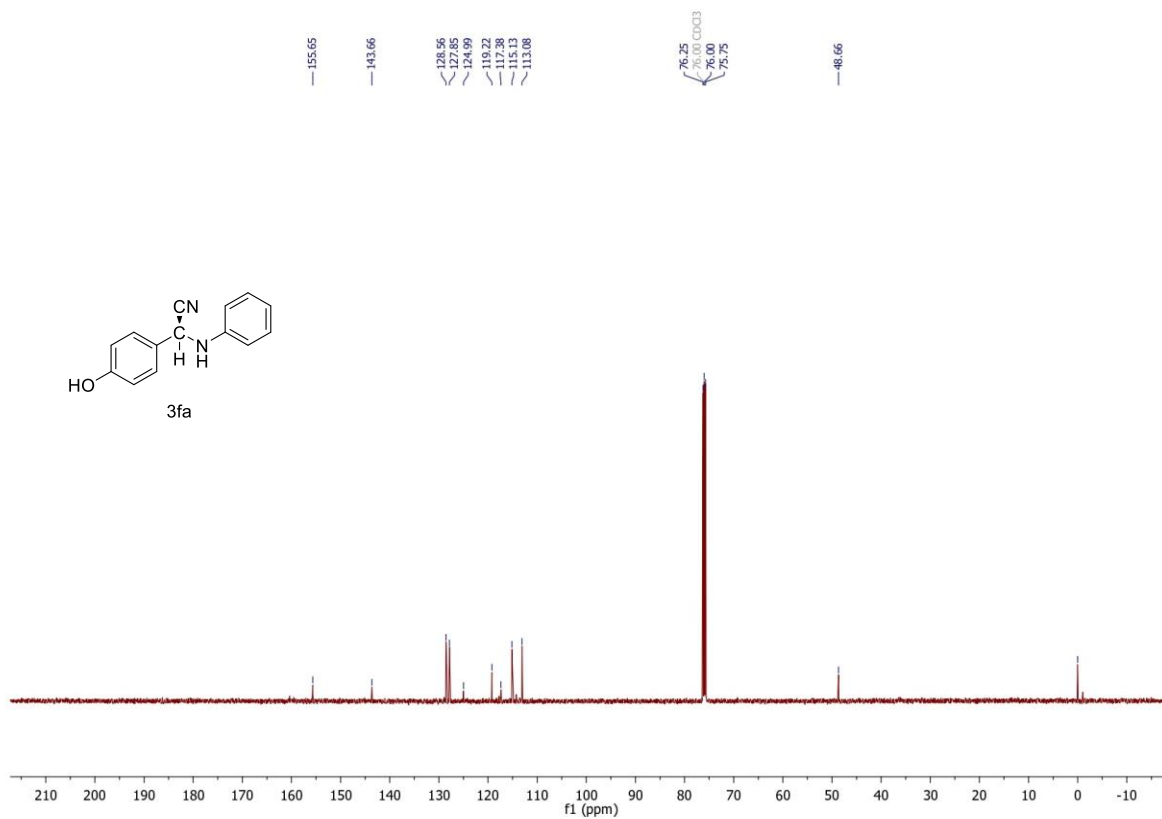

3ga

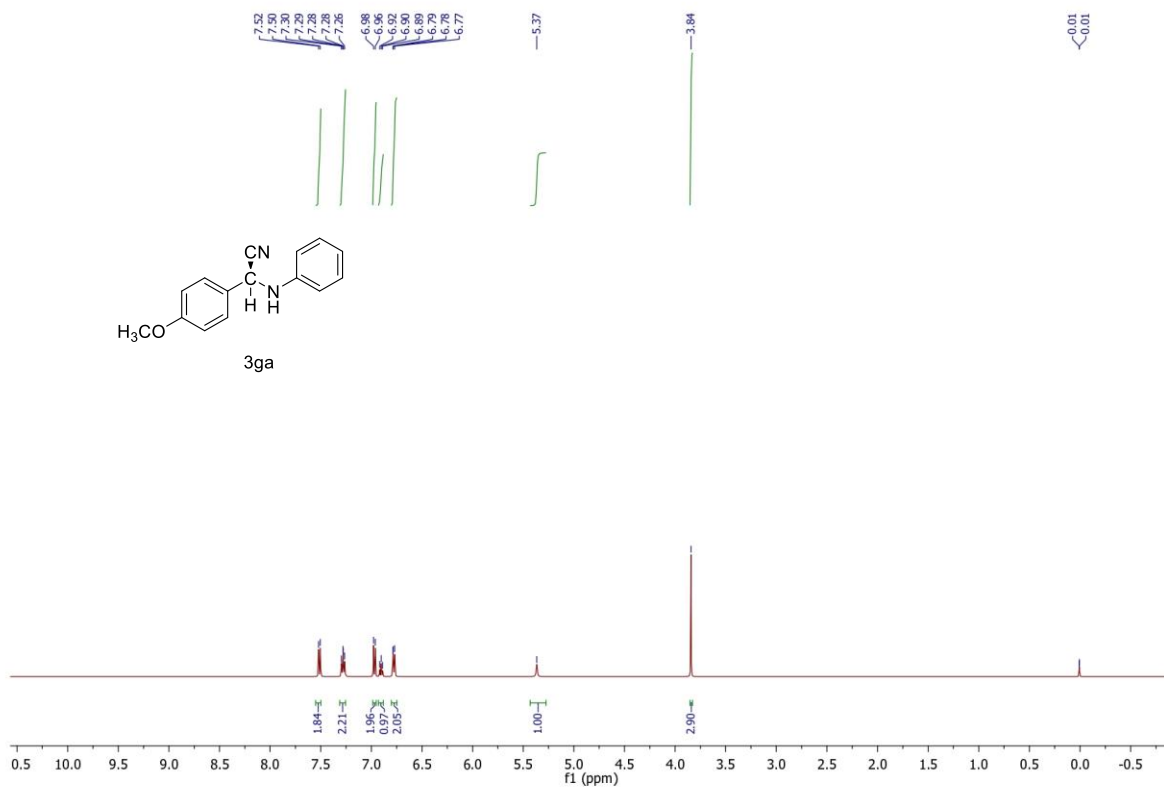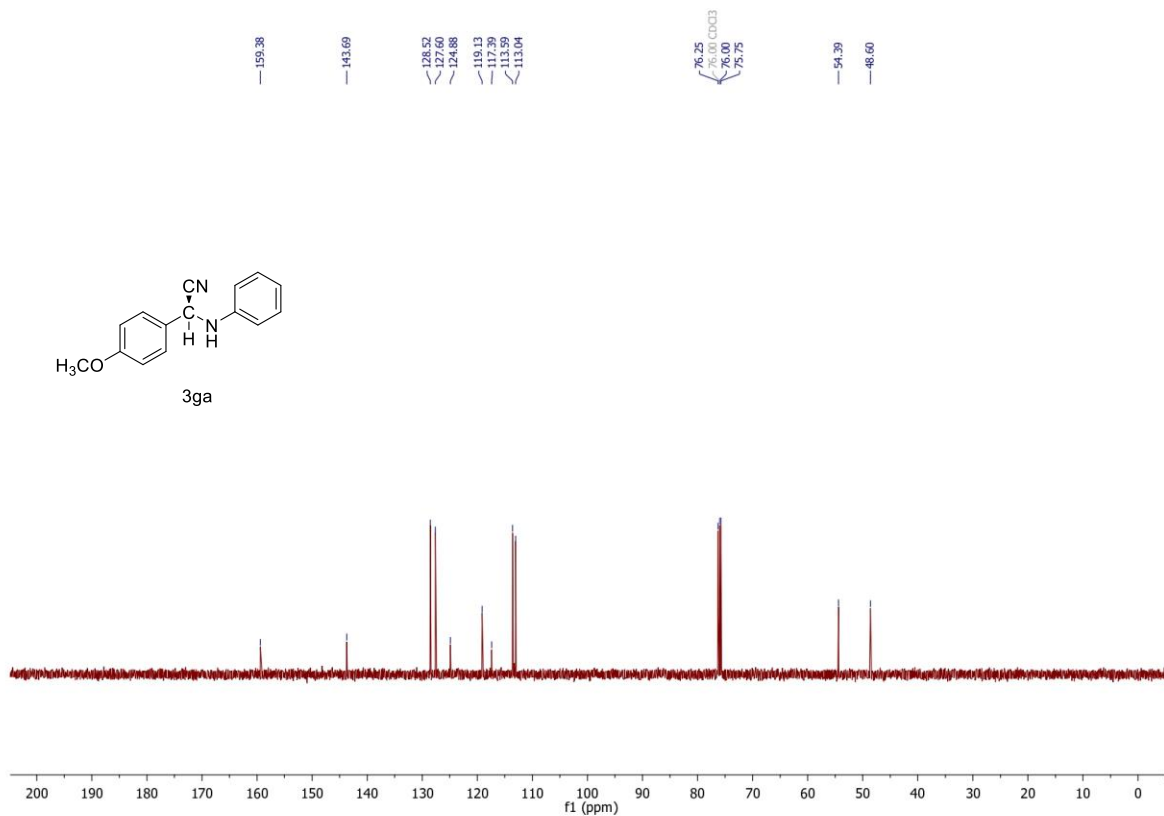

3ha

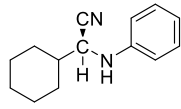

3ha

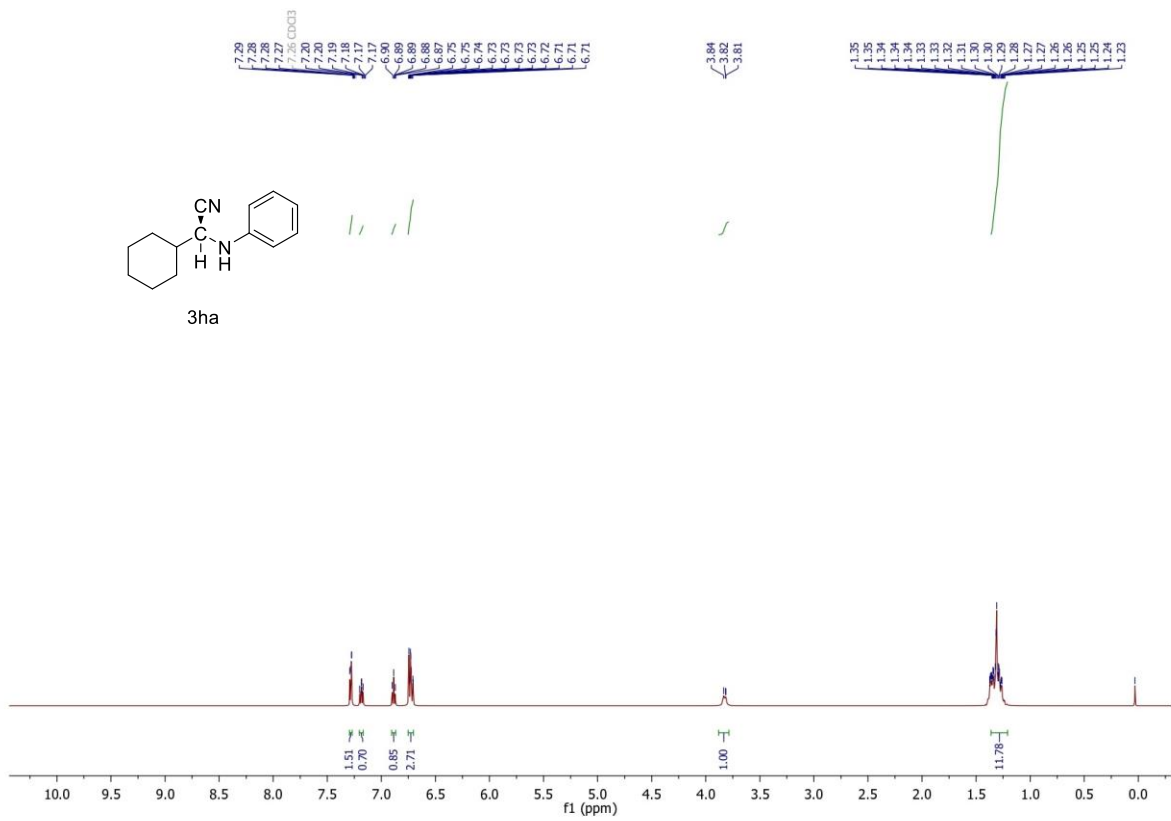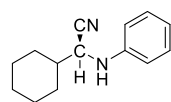

3ha

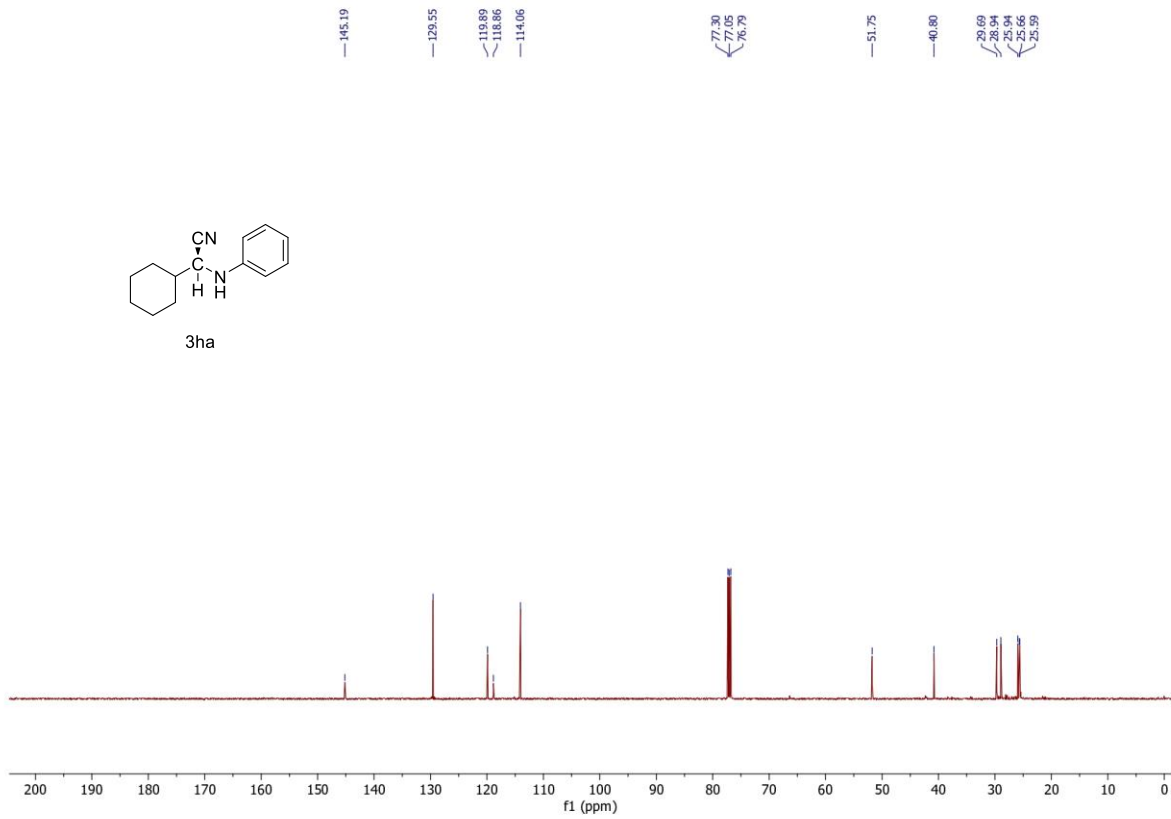



### 3ba

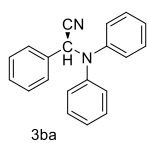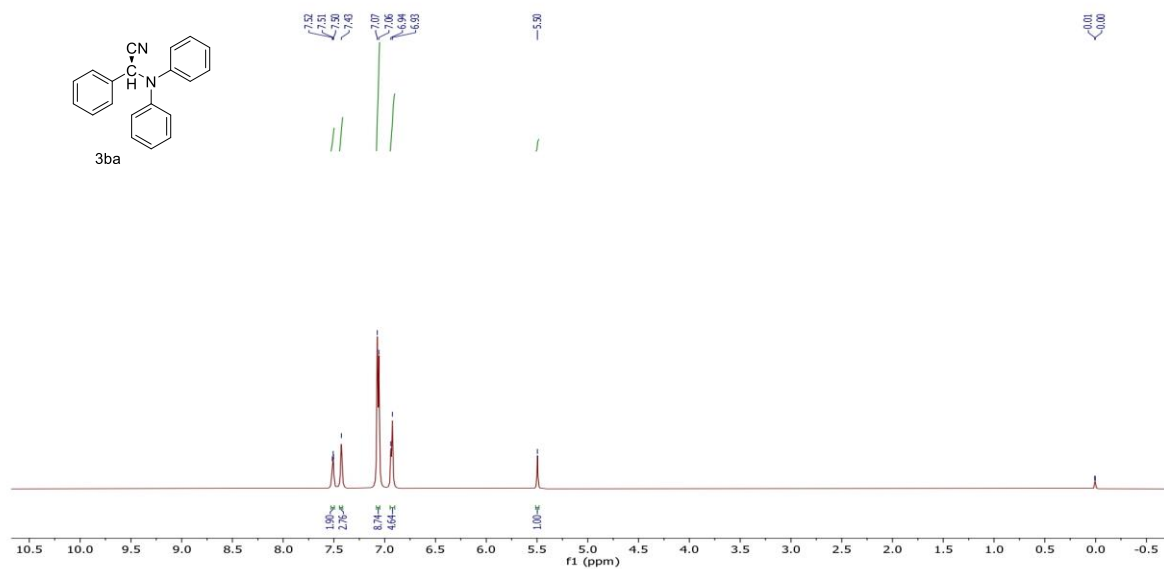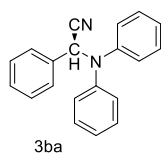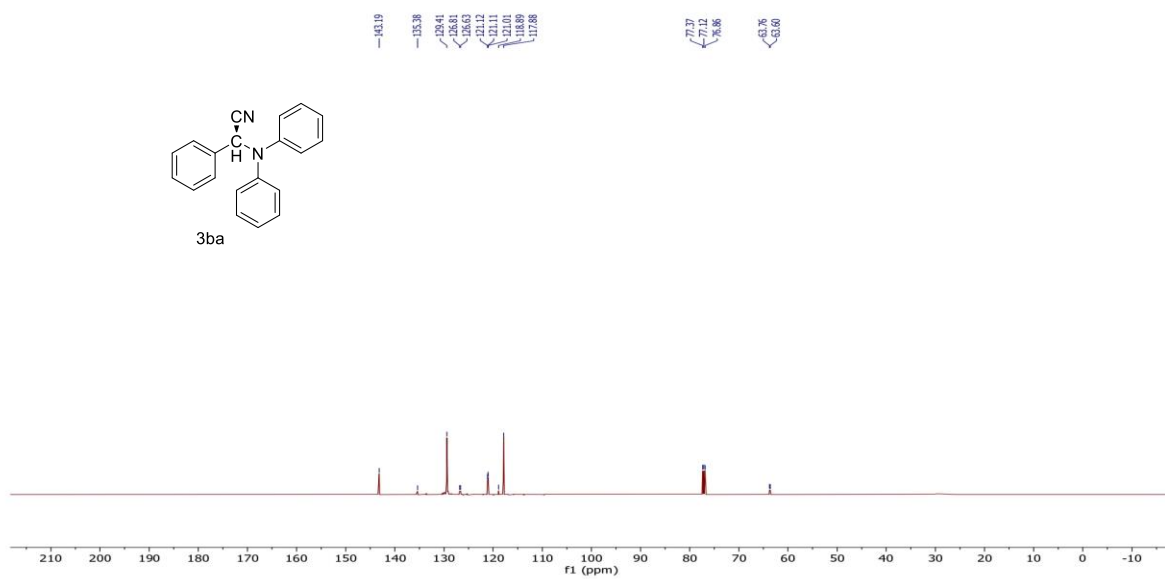

3bb

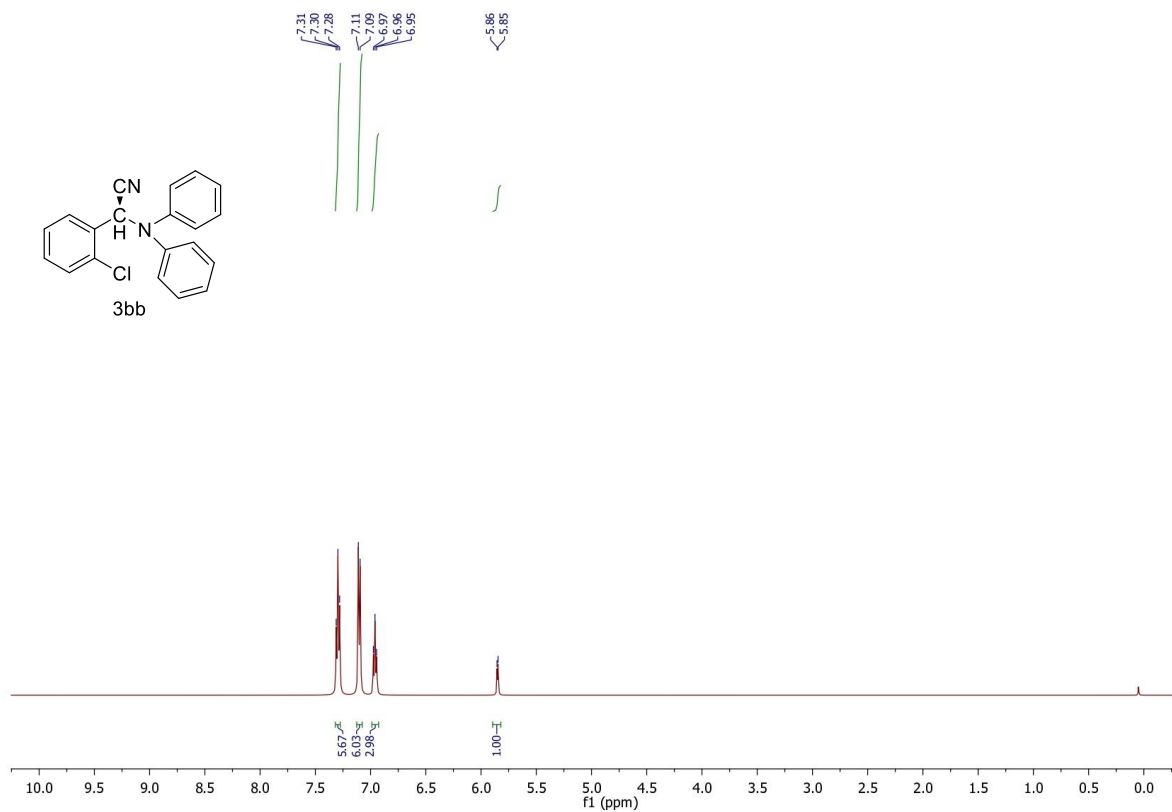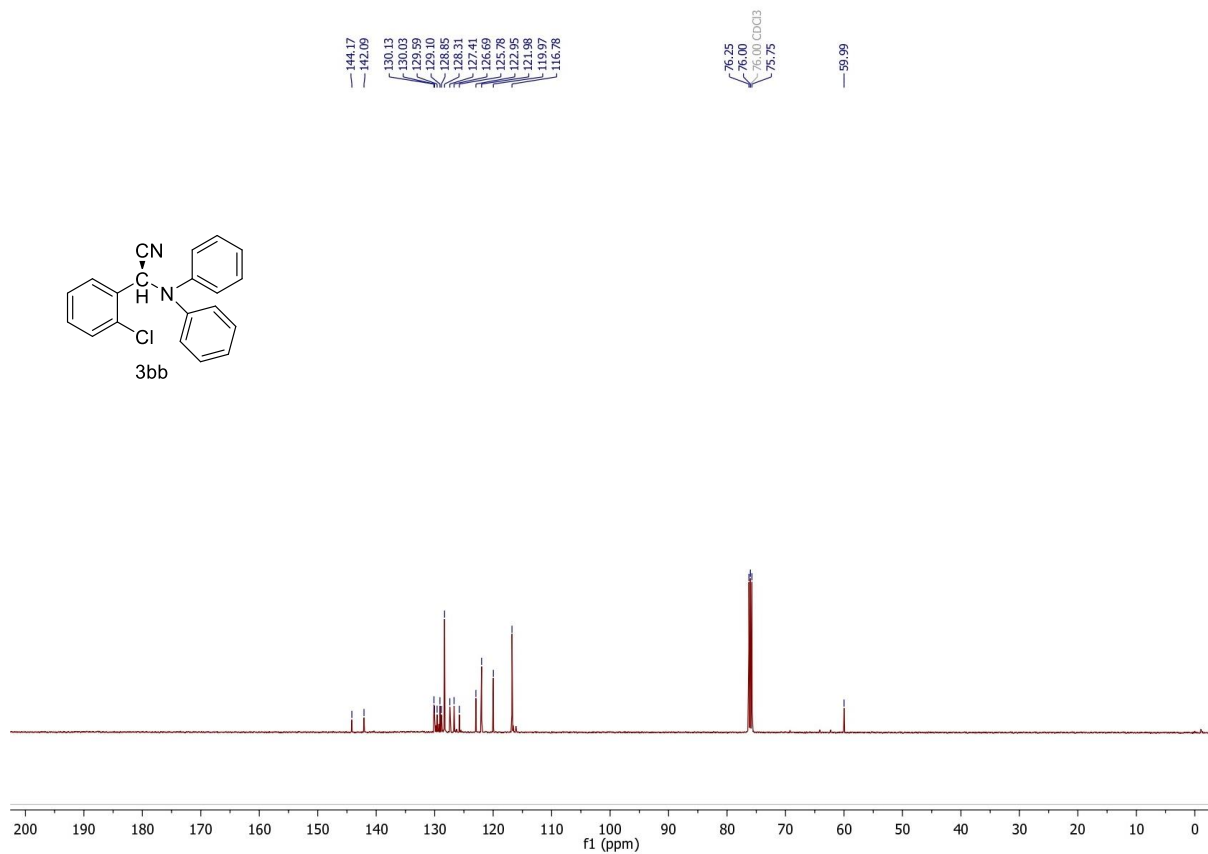

### 3cb

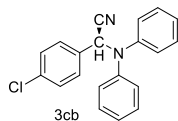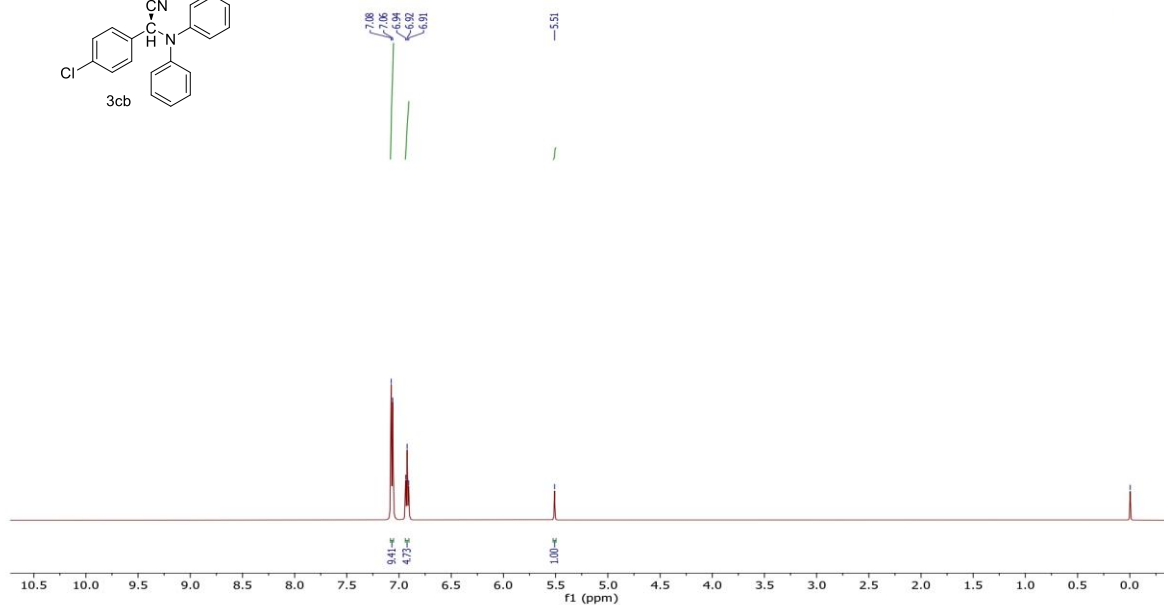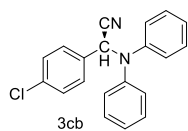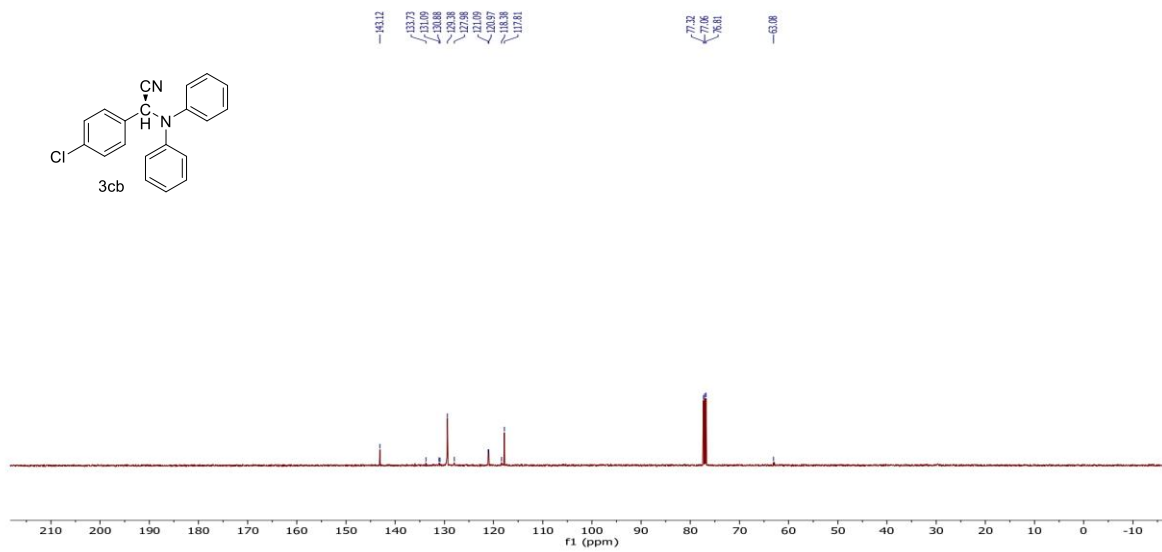

### 3db

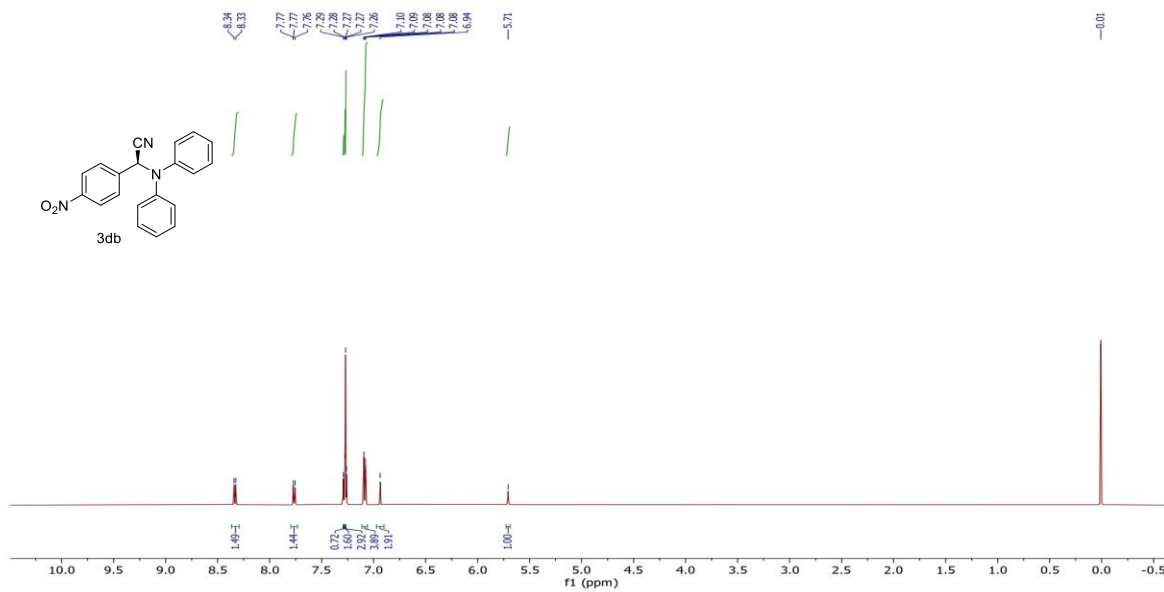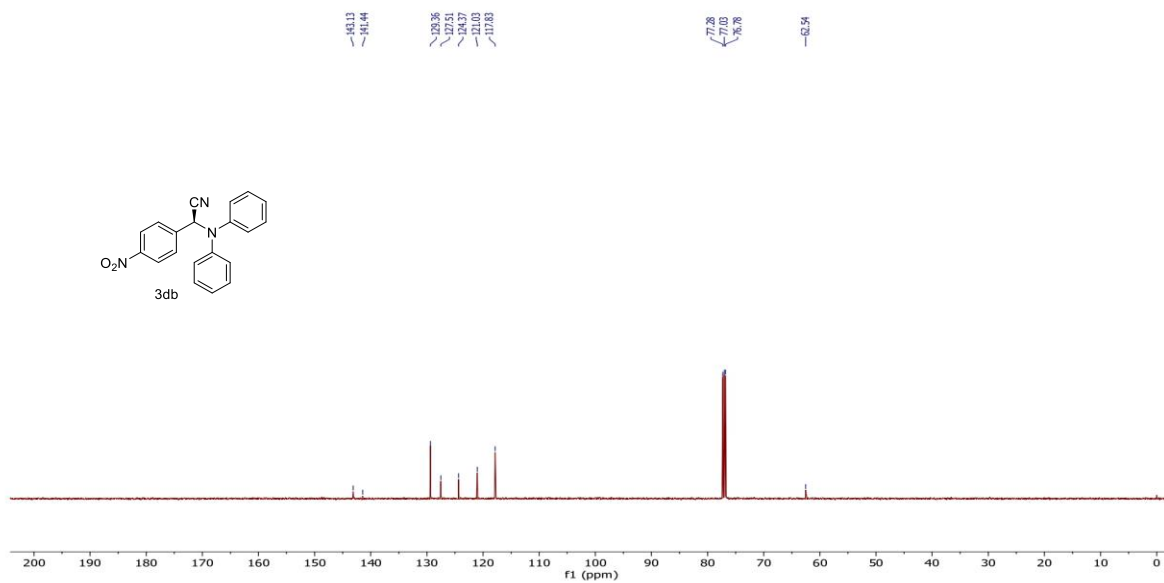

3eb

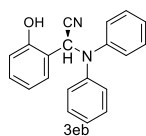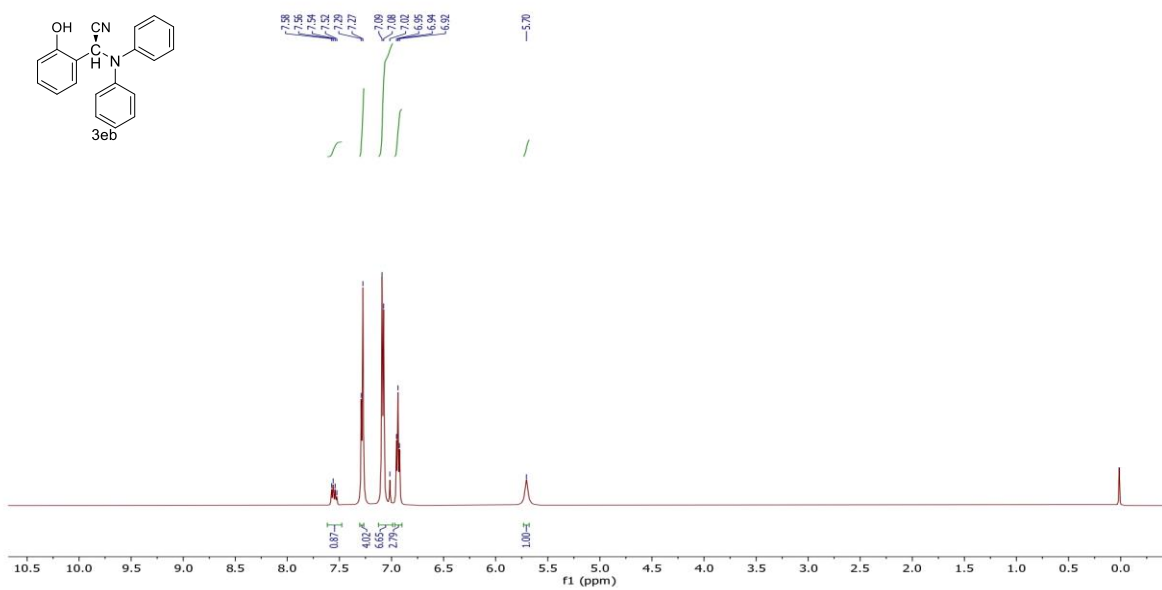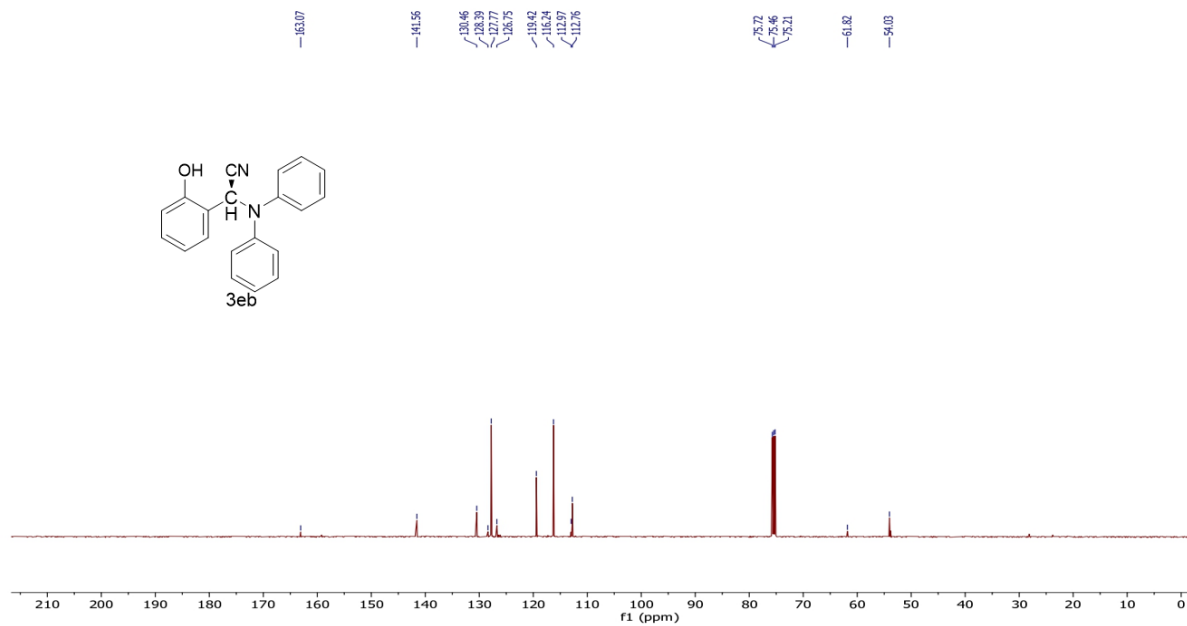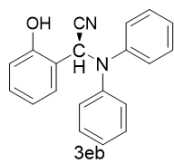

3fb

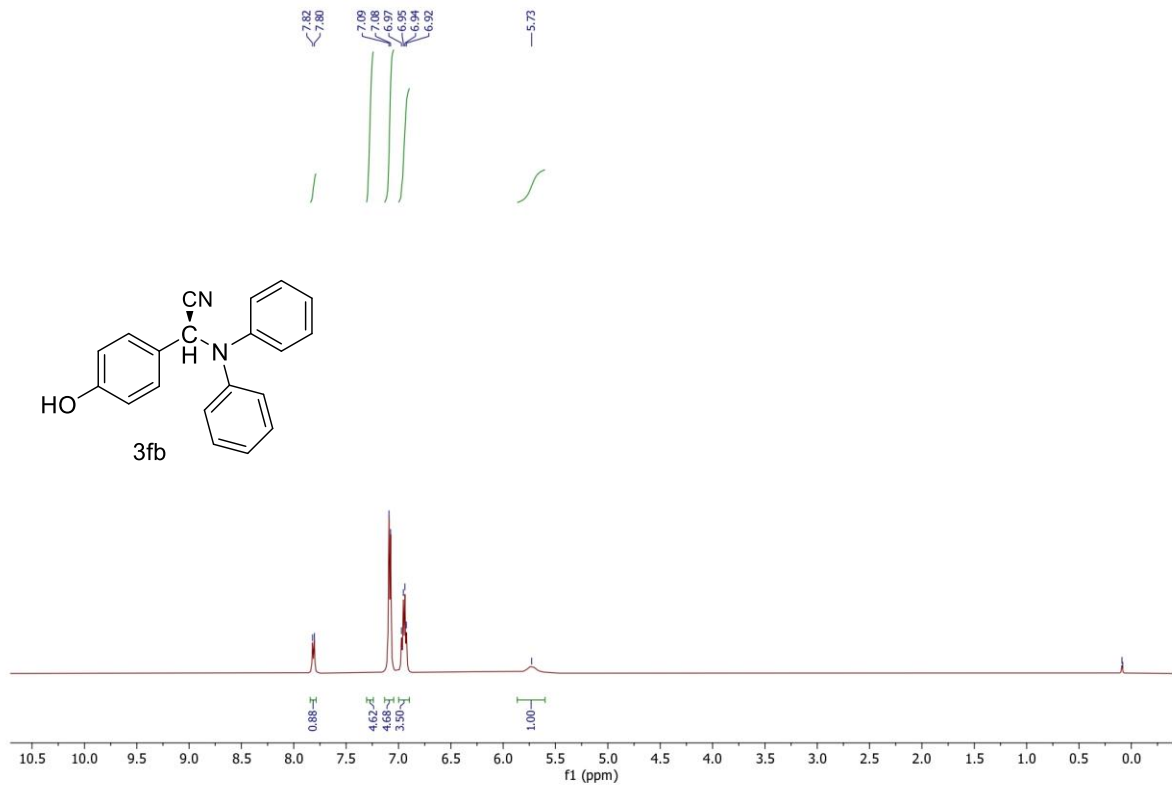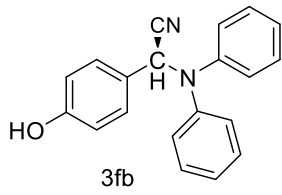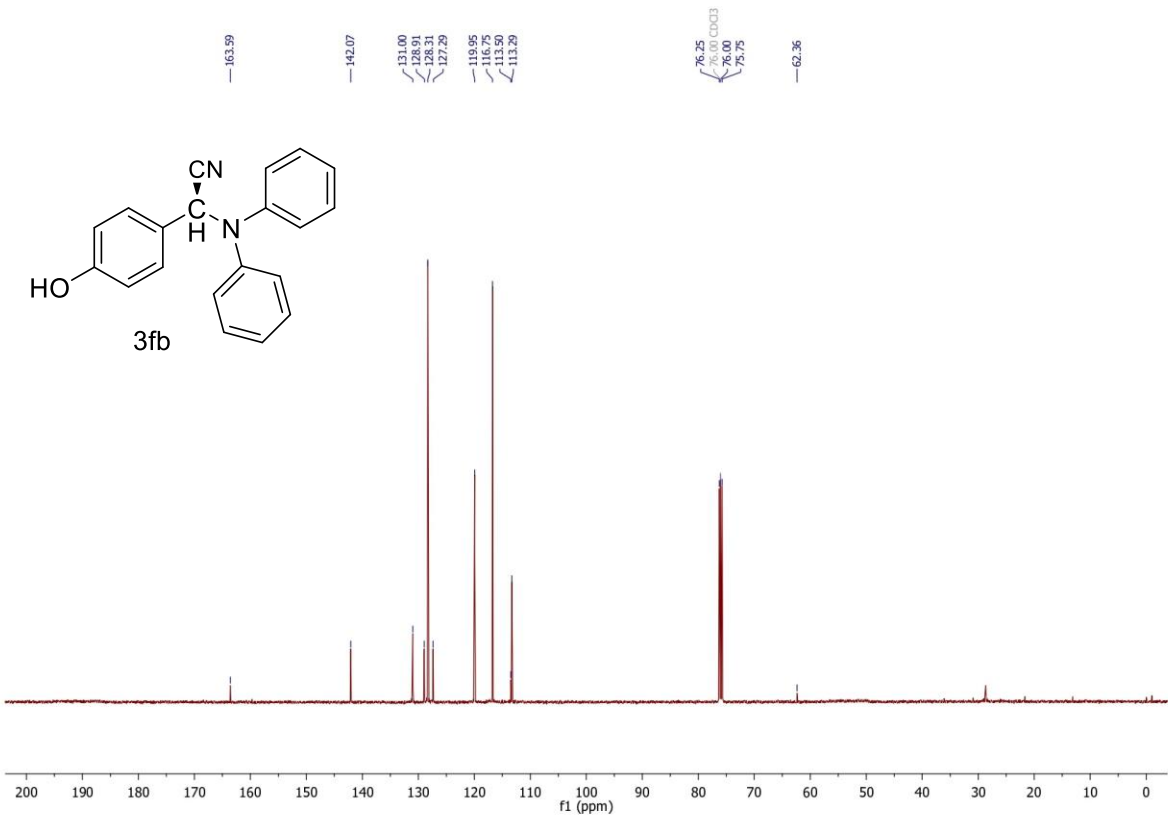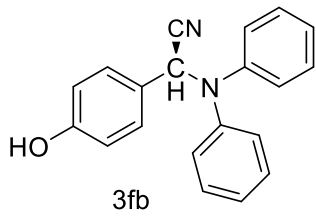

**3bg**

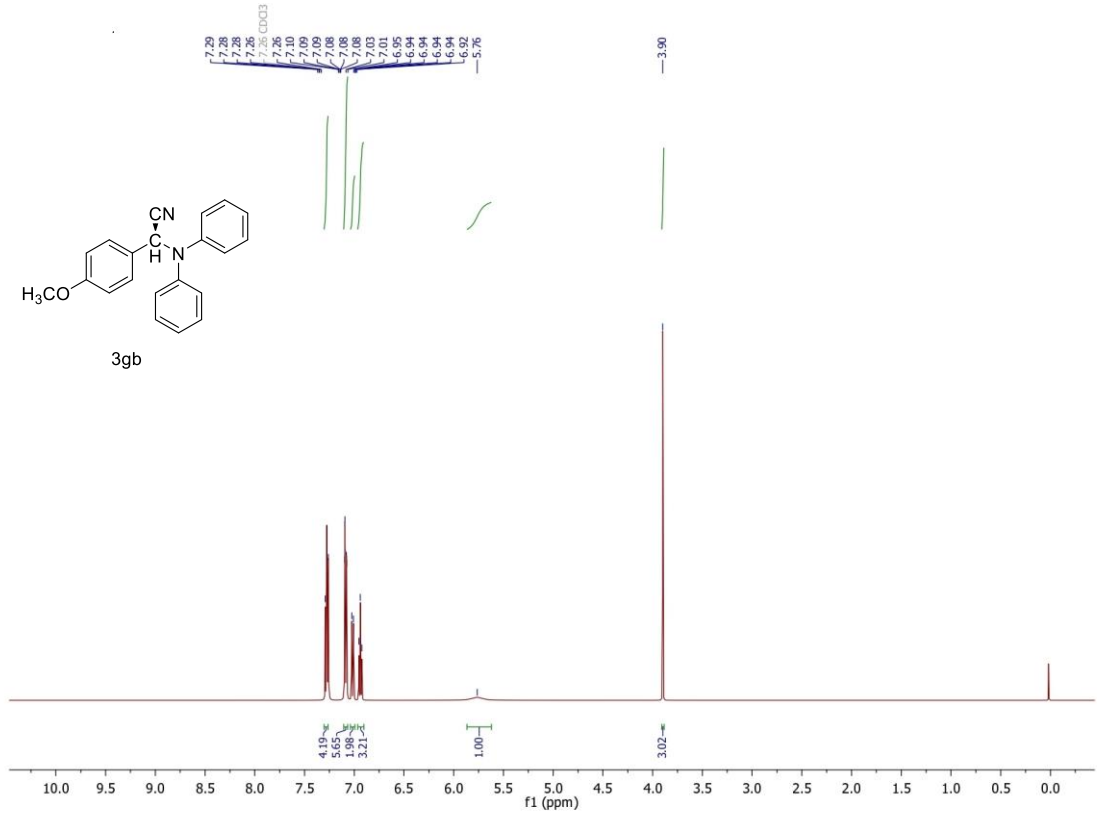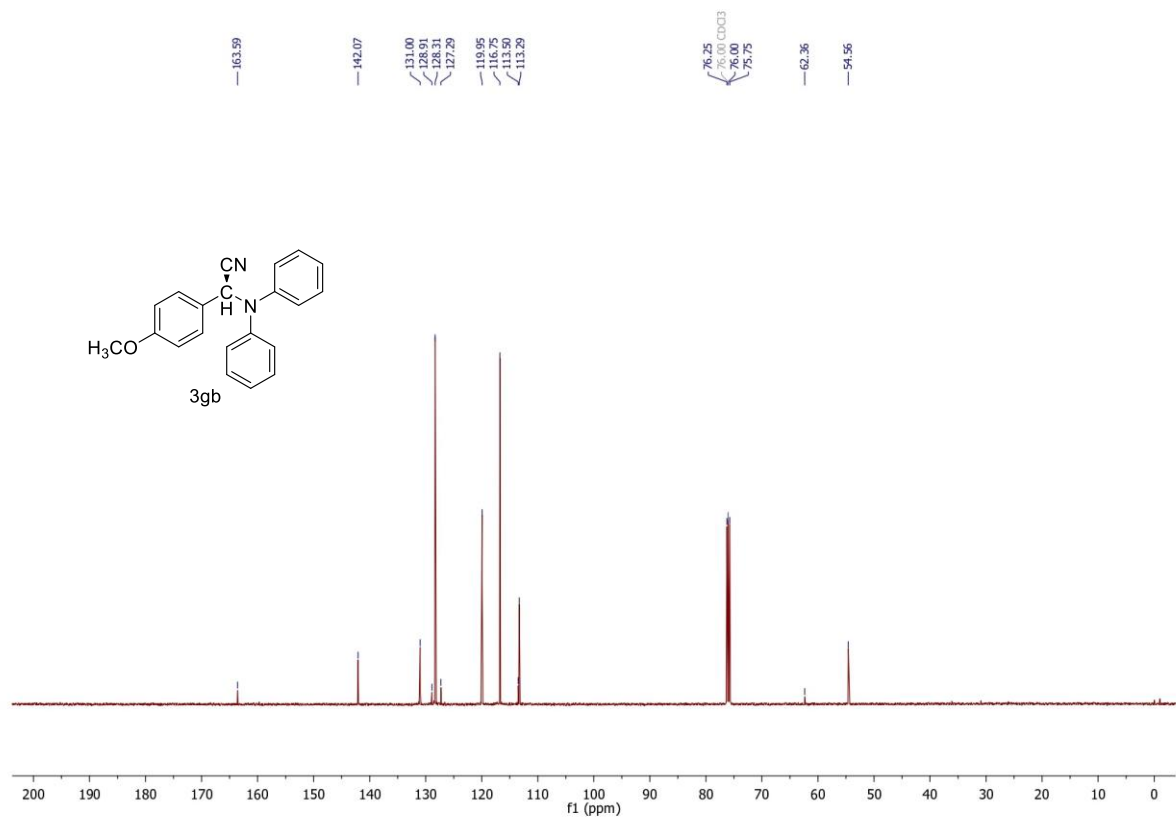

### 3hb

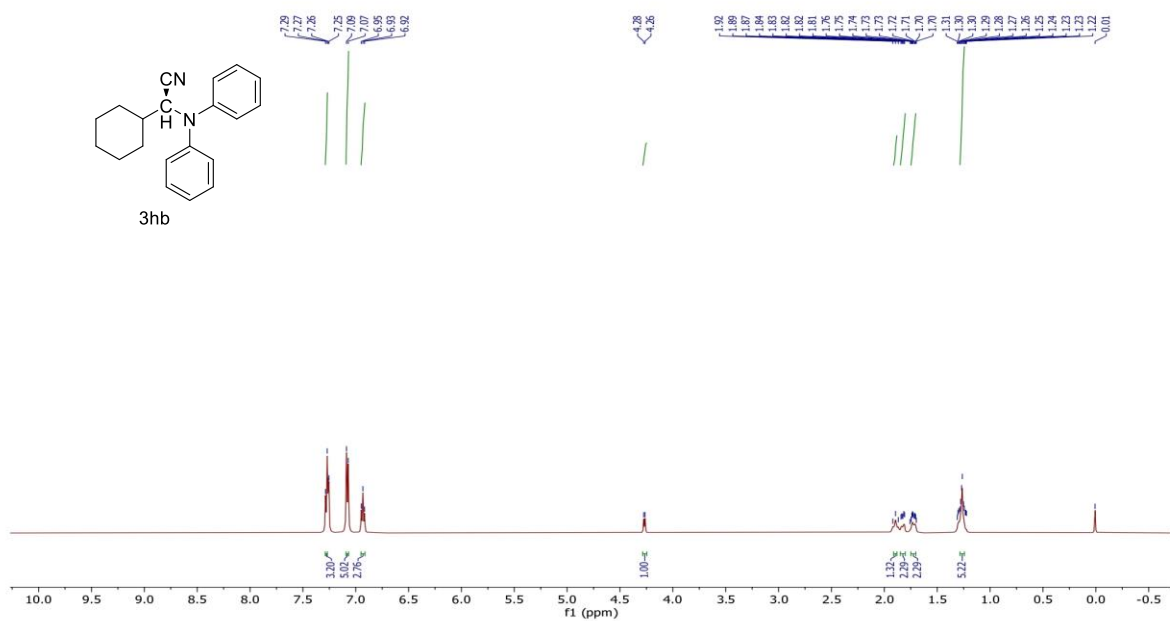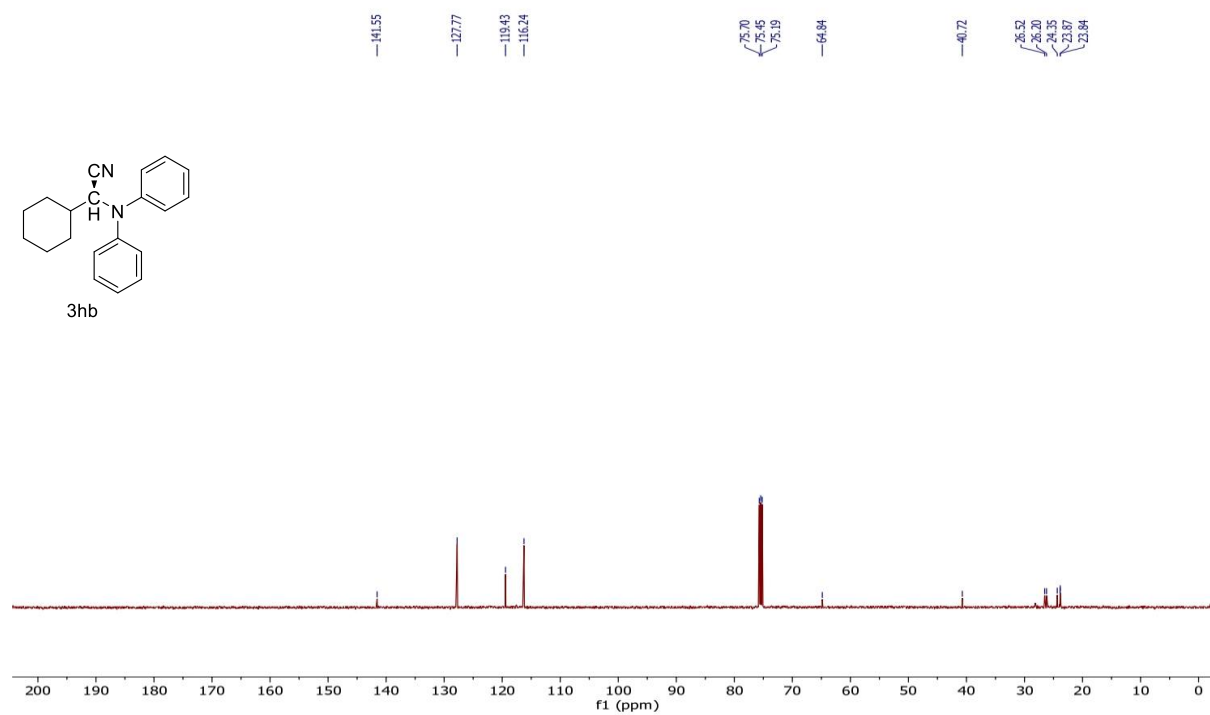



# NMR of 6

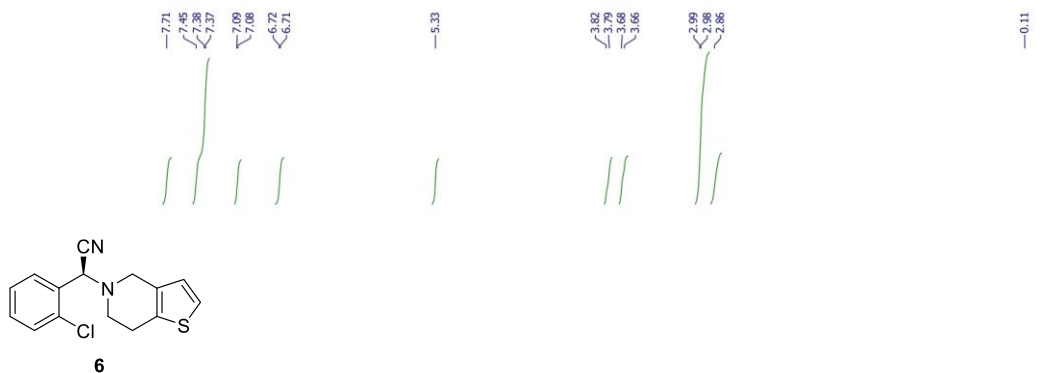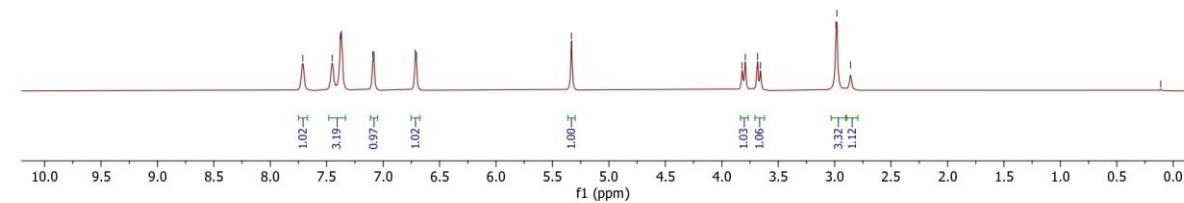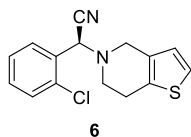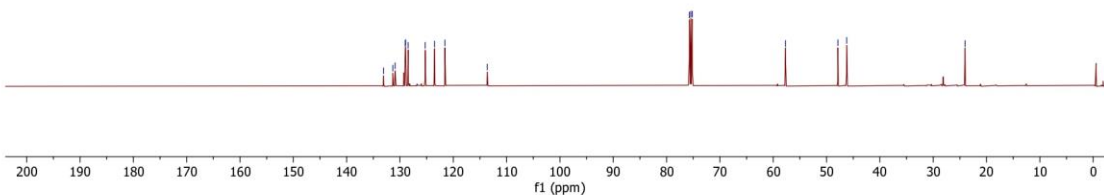

# NMR 7

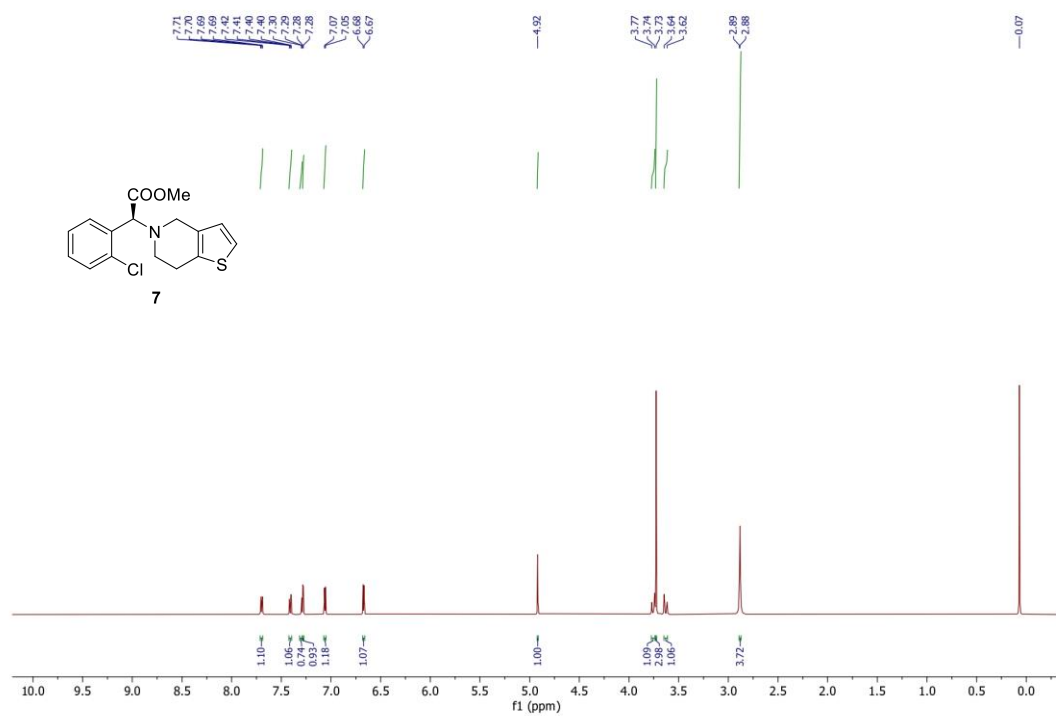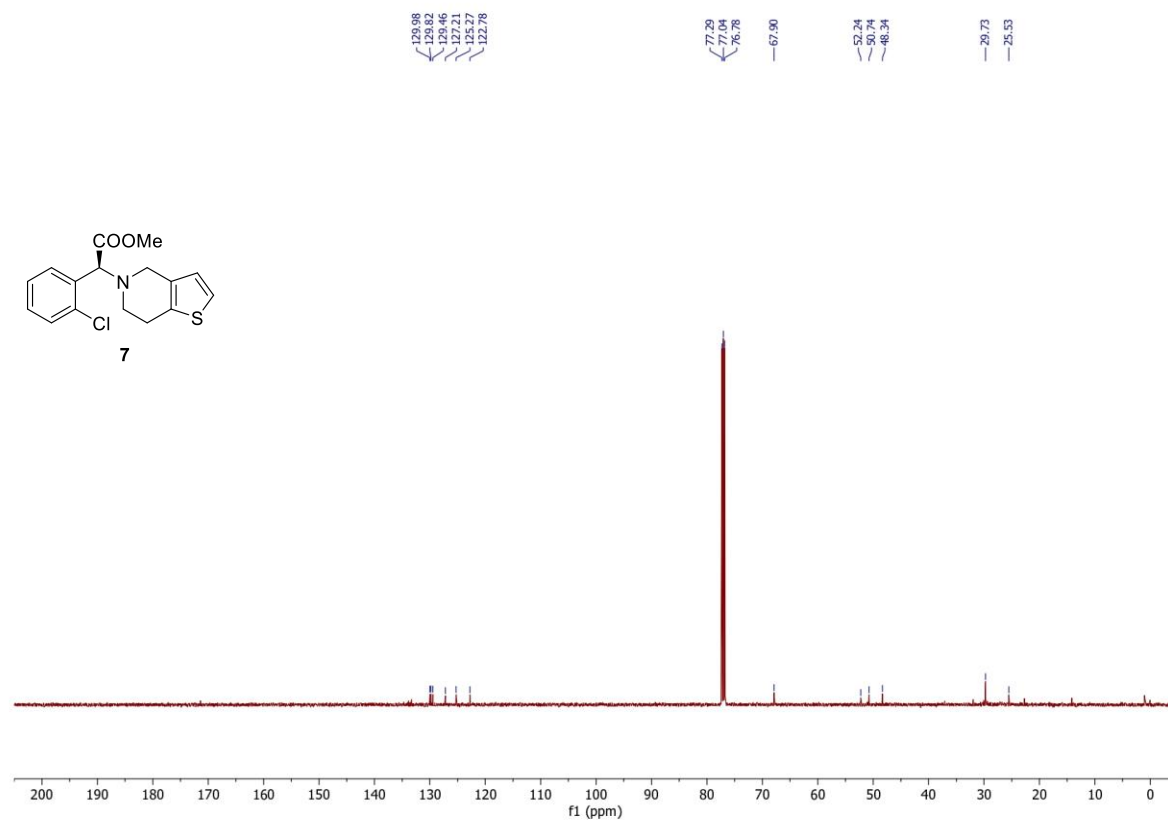

## 12. HPLC

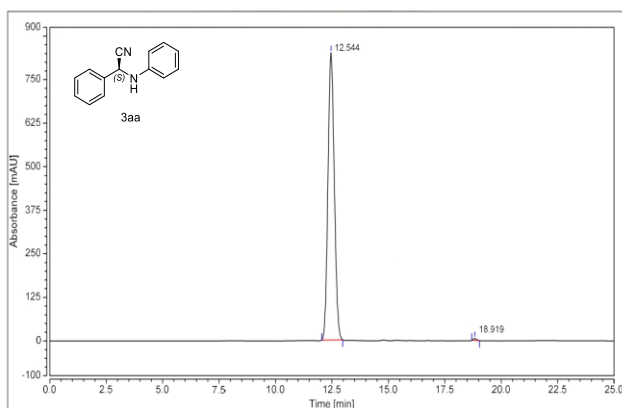

Integration Results

| Peak | Retention Time<br>min | Area<br>mAU*min | Height<br>mAU  | Relative Area<br>% | Relative Height<br>% | Amount |
|------|-----------------------|-----------------|----------------|--------------------|----------------------|--------|
| 1    | 12.544                | 268.550         | 824.576        | 99.63              | 99.32                | n.a.   |
| 2    | 18.919                | 0.996           | 5.691          | 0.37               | 0.68                 | n.a.   |
|      |                       | <b>269.546</b>  | <b>830.257</b> | <b>100.00</b>      | <b>100.00</b>        |        |

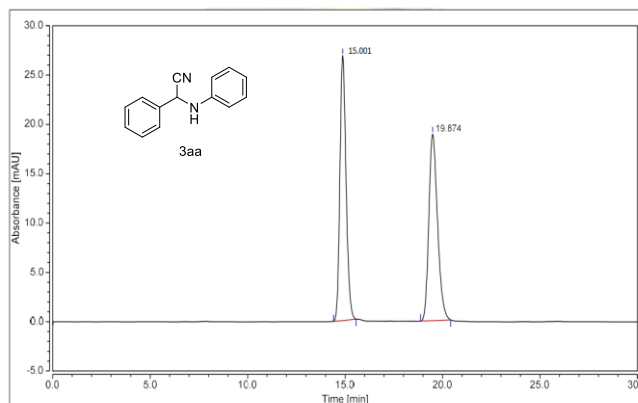

Integration Results

| Peak | Retention Time<br>min | Area<br>mAU*min | Height<br>mAU | Relative Area<br>% | Relative Height<br>% | Amount |
|------|-----------------------|-----------------|---------------|--------------------|----------------------|--------|
| 1    | 15.001                | 9.830           | 26.865        | 50.30              | 58.65                | n.a.   |
| 2    | 19.874                | 9.714           | 18.939        | 49.70              | 41.35                | n.a.   |
|      |                       | <b>19.544</b>   | <b>45.804</b> | <b>100.00</b>      | <b>100.00</b>        |        |

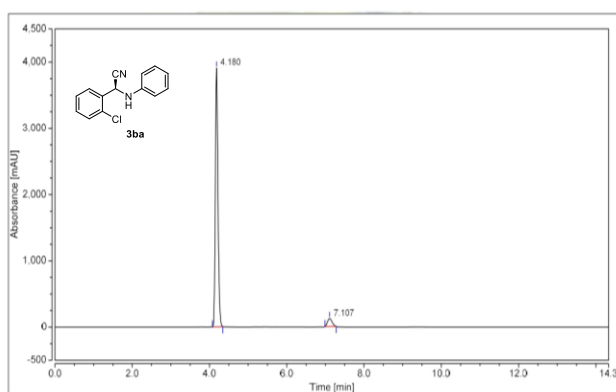

Integration Results

| Peak | Retention Time<br>min | Area<br>mAU*min | Height<br>mAU   | Relative Area<br>% | Relative Height<br>% | Amount |
|------|-----------------------|-----------------|-----------------|--------------------|----------------------|--------|
| 1    | 4.180                 | 300.203         | 3903.642        | 94.80              | 97.02                | n.a.   |
| 2    | 7.107                 | 16.471          | 119.940         | 5.20               | 2.98                 | n.a.   |
|      |                       | <b>316.674</b>  | <b>4023.581</b> | <b>100.00</b>      | <b>100.00</b>        |        |

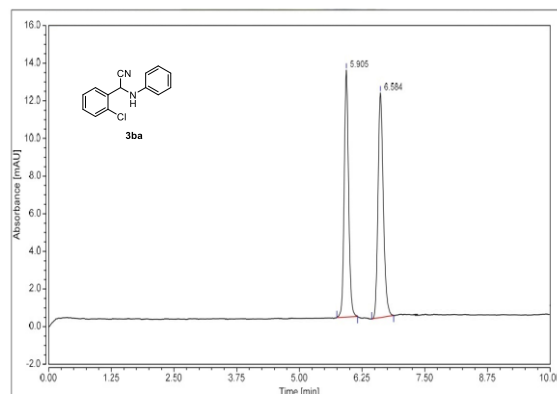

Integration Results

| Peak | Retention Time<br>min | Area<br>mAU*min | Height<br>mAU | Relative Area<br>% | Relative Height<br>% | Amount |
|------|-----------------------|-----------------|---------------|--------------------|----------------------|--------|
| 1    | 6.584                 | 1.470           | 11.934        | 52.47              | 47.63                | n.a.   |
| 2    | 5.905                 | 1.332           | 13.121        | 47.53              | 52.37                | n.a.   |
|      |                       | <b>2.802</b>    | <b>25.055</b> | <b>100.00</b>      | <b>100.00</b>        |        |

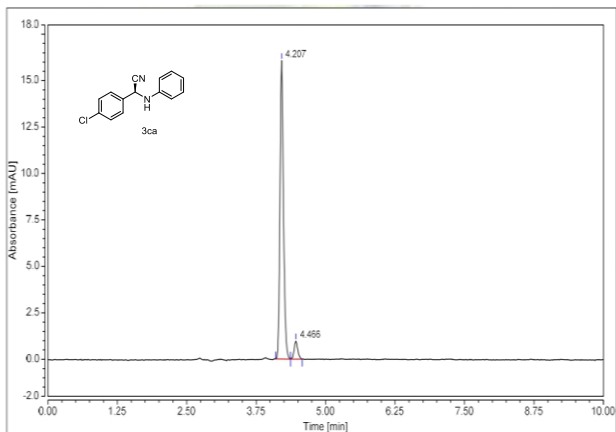

| Integration Results |                       |                 |               |                    |                      |        |
|---------------------|-----------------------|-----------------|---------------|--------------------|----------------------|--------|
| Peak                | Retention Time<br>min | Area<br>mAU*min | Height<br>mAU | Relative Area<br>% | Relative Height<br>% | Amount |
| 1                   | 4.207                 | 1.184           | 16.065        | 94.22              | 94.28                | n.a.   |
| 2                   | 4.466                 | 0.073           | 0.975         | 5.78               | 5.72                 | n.a.   |
|                     |                       | <b>1.257</b>    | <b>17.040</b> | <b>100.00</b>      | <b>100.00</b>        |        |

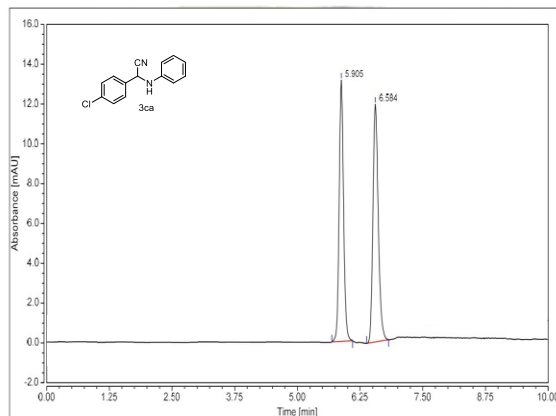

| Integration Results |                       |                 |               |                    |                      |        |
|---------------------|-----------------------|-----------------|---------------|--------------------|----------------------|--------|
| Peak                | Retention Time<br>min | Area<br>mAU*min | Height<br>mAU | Relative Area<br>% | Relative Height<br>% | Amount |
| 1                   | 5.905                 | 1.470           | 11.934        | 52.47              | 47.63                | n.a.   |
| 2                   | 6.584                 | 1.332           | 13.121        | 47.53              | 52.37                | n.a.   |
|                     |                       | <b>2.802</b>    | <b>25.055</b> | <b>100.00</b>      | <b>100.00</b>        |        |

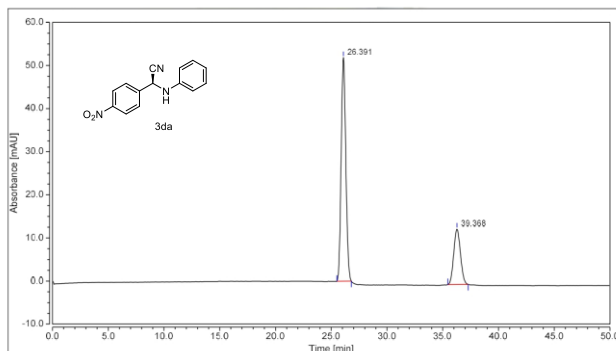

| Integration Results |                       |                 |               |                    |                      |        |
|---------------------|-----------------------|-----------------|---------------|--------------------|----------------------|--------|
| Peak                | Retention Time<br>min | Area<br>mAU*min | Height<br>mAU | Relative Area<br>% | Relative Height<br>% | Amount |
| 1                   | 26.391                | 24.970          | 51.876        | 73.53              | 80.08                | n.a.   |
| 2                   | 39.368                | 8.990           | 12.903        | 26.47              | 19.92                | n.a.   |
|                     |                       | <b>33.960</b>   | <b>64.778</b> | <b>100.00</b>      | <b>100.00</b>        |        |

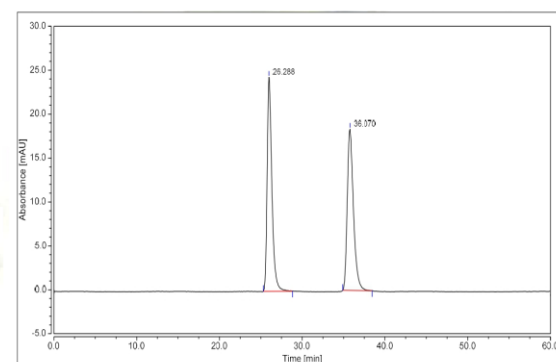

| Integration Results |                       |                 |               |                    |                      |        |
|---------------------|-----------------------|-----------------|---------------|--------------------|----------------------|--------|
| Peak                | Retention Time<br>min | Area<br>mAU*min | Height<br>mAU | Relative Area<br>% | Relative Height<br>% | Amount |
| 1                   | 26.288                | 16.192          | 24.360        | 50.47              | 57.02                | n.a.   |
| 2                   | 36.070                | 15.892          | 18.377        | 49.53              | 42.98                | n.a.   |
|                     |                       | <b>32.084</b>   | <b>42.737</b> | <b>100.00</b>      | <b>100.00</b>        |        |

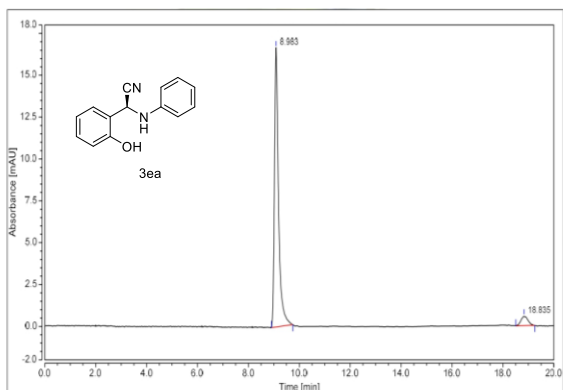

**Integration Results**

| Peak | Retention Time<br>min | Area<br>mAU*min | Height<br>mAU | Relative Area<br>% | Relative Height<br>% | Amount |
|------|-----------------------|-----------------|---------------|--------------------|----------------------|--------|
| 1    | 8.983                 | 3.084           | 16.684        | 94.58              | 96.64                | n.a.   |
| 2    | 18.835                | 0.177           | 0.580         | 5.42               | 3.36                 | n.a.   |
|      |                       | <b>3.261</b>    | <b>17.264</b> | <b>100.00</b>      | <b>100.00</b>        |        |

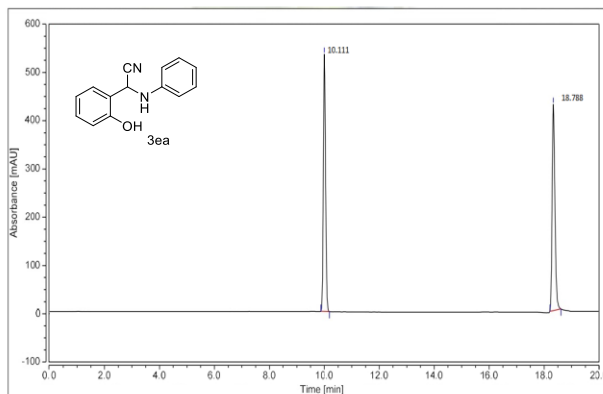

**Integration Results**

| Peak | Retention Time<br>min | Area<br>mAU*min | Height<br>mAU  | Relative Area<br>% | Relative Height<br>% | Amount |
|------|-----------------------|-----------------|----------------|--------------------|----------------------|--------|
| 1    | 10.111                | 42.543          | 427.287        | 50.28              | 44.50                | n.a.   |
| 2    | 18.788                | 42.074          | 532.961        | 49.72              | 55.50                | n.a.   |
|      |                       | <b>84.617</b>   | <b>960.248</b> | <b>100.00</b>      | <b>100.00</b>        |        |

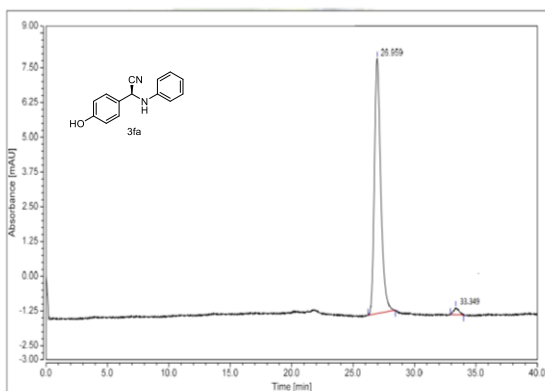

**Integration Results**

| Peak | Retention Time<br>min | Area<br>mAU*min | Height<br>mAU | Relative Area<br>% | Relative Height<br>% | Amount |
|------|-----------------------|-----------------|---------------|--------------------|----------------------|--------|
| 1    | 26.959                | 5.522           | 9.173         | 97.78              | 97.38                | n.a.   |
| 2    | 33.349                | 0.125           | 0.247         | 2.22               | 2.62                 | n.a.   |
|      |                       | <b>5.648</b>    | <b>9.420</b>  | <b>100.00</b>      | <b>100.00</b>        |        |

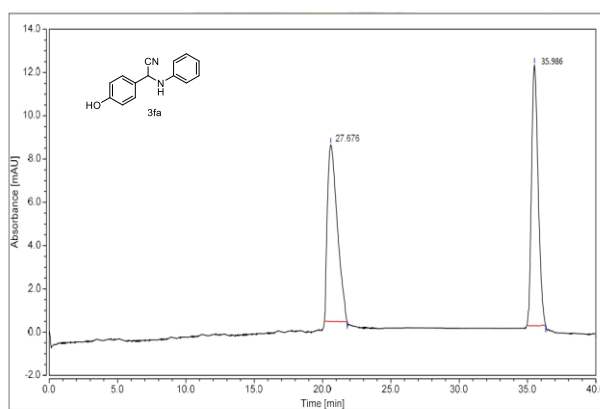

**Integration Results**

| Peak | Retention Time<br>min | Area<br>mAU*min | Height<br>mAU | Relative Area<br>% | Relative Height<br>% | Amount |
|------|-----------------------|-----------------|---------------|--------------------|----------------------|--------|
| 1    | 27.676                | 7.063           | 6.244         | 51.28              | 40.70                | n.a.   |
| 2    | 35.986                | 6.730           | 12.010        | 48.72              | 59.30                | n.a.   |
|      |                       | <b>13.813</b>   | <b>20.254</b> | <b>100.00</b>      | <b>100.00</b>        |        |

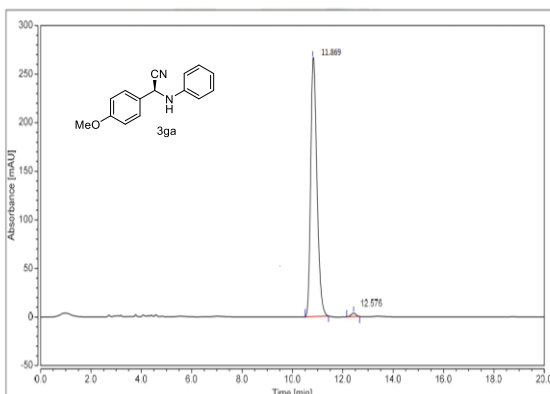

**Integration Results**

| Peak | Retention Time<br>min | Area<br>mAU*min | Height<br>mAU  | Relative Area<br>% | Relative Height<br>% | Amount |
|------|-----------------------|-----------------|----------------|--------------------|----------------------|--------|
| 1    | 11.869                | 77.155          | 268.950        | 98.96              | 96.72                | n.a.   |
| 2    | 12.576                | 0.808           | 3.500          | 1.04               | 1.28                 | n.a.   |
|      |                       | <b>77.963</b>   | <b>272.449</b> | <b>100.00</b>      | <b>100.00</b>        |        |

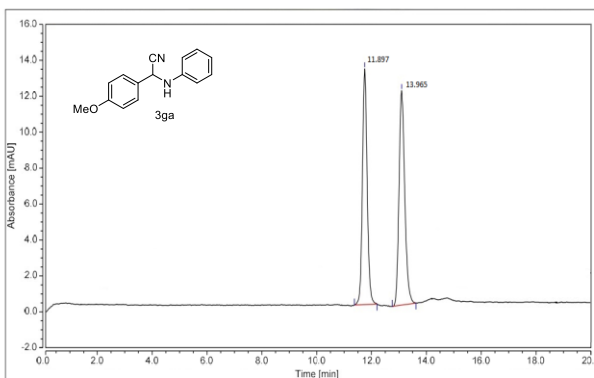

**Integration Results**

| Peak | Retention Time<br>min | Area<br>mAU*min | Height<br>mAU | Relative Area<br>% | Relative Height<br>% | Amount |
|------|-----------------------|-----------------|---------------|--------------------|----------------------|--------|
| 1    | 11.897                | 1.470           | 11.534        | 62.47              | 47.63                | n.a.   |
| 2    | 13.965                | 1.332           | 13.121        | 47.53              | 52.37                | n.a.   |
|      |                       | <b>2.802</b>    | <b>25.055</b> | <b>100.00</b>      | <b>100.00</b>        |        |

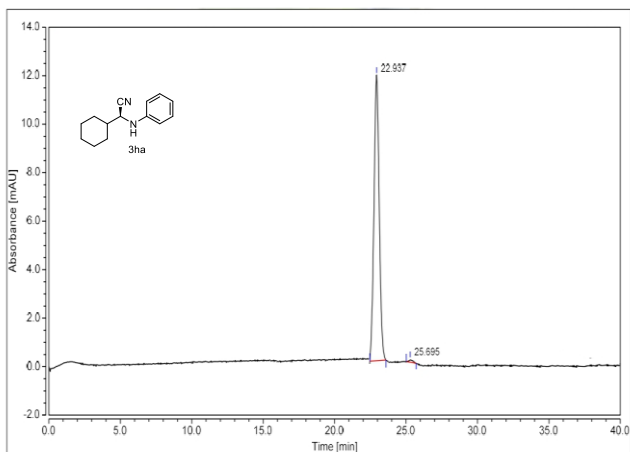

**Integration Results**

| Peak | Retention Time<br>min | Area<br>mAU*min | Height<br>mAU | Relative Area<br>% | Relative Height<br>% | Amount |
|------|-----------------------|-----------------|---------------|--------------------|----------------------|--------|
| 1    | 22.937                | 4.974           | 11.780        | 99.28              | 98.92                | n.a.   |
| 2    | 25.695                | 0.036           | 0.128         | 0.72               | 1.08                 | n.a.   |
|      |                       | <b>5.010</b>    | <b>11.908</b> | <b>100.00</b>      | <b>100.00</b>        |        |

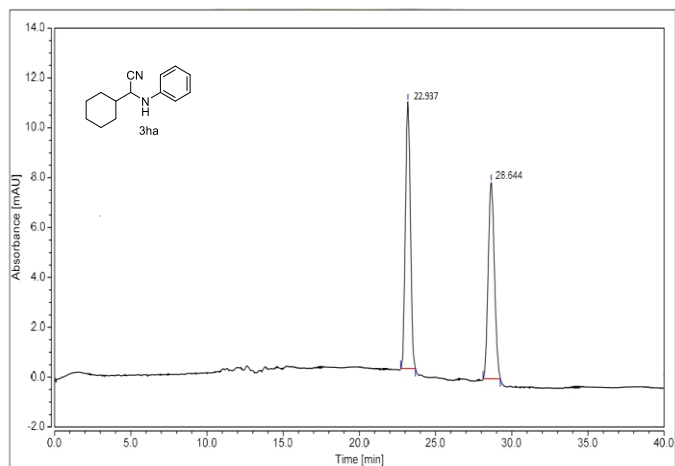

**Integration Results**

| Peak | Retention Time<br>min | Area<br>mAU*min | Height<br>mAU | Relative Area<br>% | Relative Height<br>% | Amount |
|------|-----------------------|-----------------|---------------|--------------------|----------------------|--------|
| 1    | 22.937                | 4.007           | 10.692        | 51.89              | 57.57                | n.a.   |
| 2    | 28.644                | 3.715           | 7.880         | 48.11              | 42.43                | n.a.   |
|      |                       | <b>7.722</b>    | <b>18.572</b> | <b>100.00</b>      | <b>100.00</b>        |        |

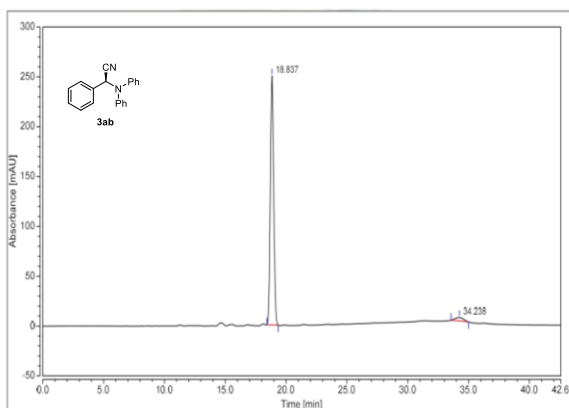

**Integration Results**

| Peak | Retention Time<br>min | Area<br>mAU*min | Height<br>mAU  | Relative Area<br>% | Relative Height<br>% | Amount |
|------|-----------------------|-----------------|----------------|--------------------|----------------------|--------|
| 1    | 18.837                | 73.379          | 249.831        | 96.58              | 98.58                | n.a.   |
| 2    | 34.238                | 2.812           | 3.597          | 3.42               | 1.42                 | n.a.   |
|      |                       | <b>82.191</b>   | <b>253.427</b> | <b>100.00</b>      | <b>100.00</b>        |        |

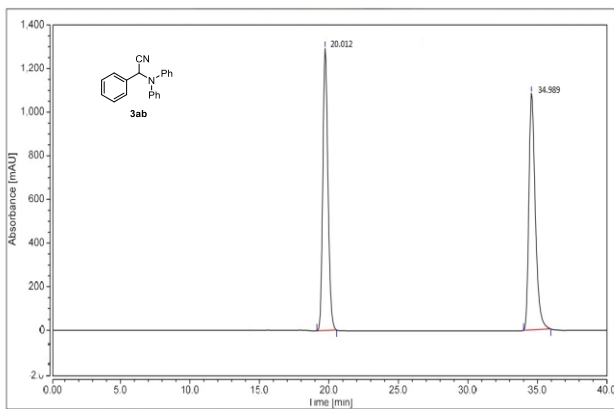

**Integration Results**

| Peak | Retention Time<br>min | Area<br>mAU*min | Height<br>mAU   | Relative Area<br>% | Relative Height<br>% | Amount |
|------|-----------------------|-----------------|-----------------|--------------------|----------------------|--------|
| 1    | 20.012                | 116.913         | 1084.075        | 51.17              | 45.60                | n.a.   |
| 2    | 34.989                | 111.546         | 1293.323        | 48.83              | 54.40                | n.a.   |
|      |                       | <b>228.459</b>  | <b>2377.398</b> | <b>100.00</b>      | <b>100.00</b>        |        |

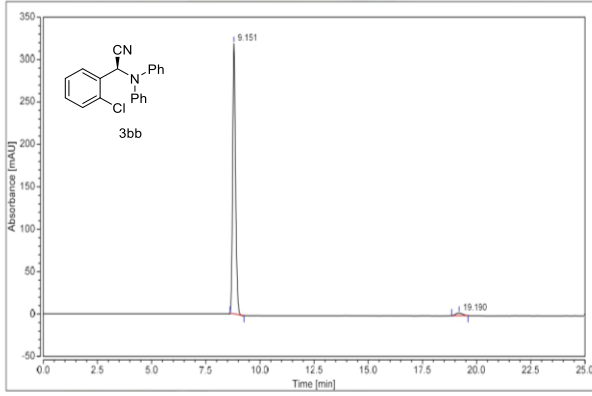

| Integration Results |                       |                 |                |                    |                      |        |
|---------------------|-----------------------|-----------------|----------------|--------------------|----------------------|--------|
| Peak                | Retention Time<br>min | Area<br>mAU*min | Height<br>mAU  | Relative Area<br>% | Relative Height<br>% | Amount |
| 1                   | 9.151                 | 49.735          | 318.597        | 97.77              | 99.07                | n.a.   |
| 2                   | 19.190                | 1.135           | 2.993          | 2.23               | 0.93                 | n.a.   |
|                     |                       | <b>50.870</b>   | <b>321.590</b> | <b>100.00</b>      | <b>100.00</b>        |        |

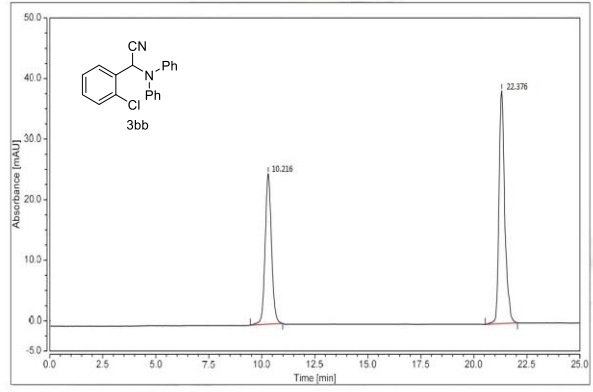

| Integration Results |                       |                 |               |                    |                      |        |
|---------------------|-----------------------|-----------------|---------------|--------------------|----------------------|--------|
| Peak                | Retention Time<br>min | Area<br>mAU*min | Height<br>mAU | Relative Area<br>% | Relative Height<br>% | Amount |
| 1                   | 10.216                | 8.639           | 24.835        | 50.10              | 42.03                | n.a.   |
| 2                   | 22.376                | 8.605           | 34.258        | 49.90              | 57.97                | n.a.   |
|                     |                       | <b>17.244</b>   | <b>59.093</b> | <b>100.00</b>      | <b>100.00</b>        |        |

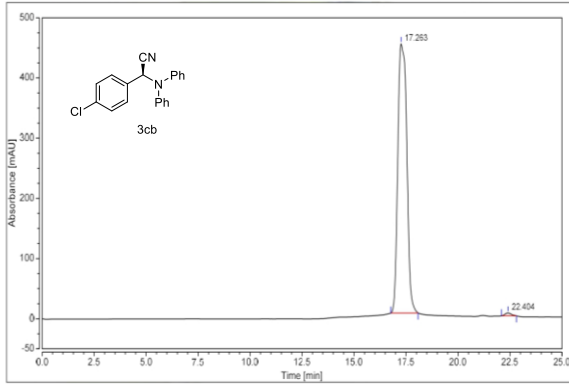

| Integration Results |                       |                 |                |                    |                      |        |
|---------------------|-----------------------|-----------------|----------------|--------------------|----------------------|--------|
| Peak                | Retention Time<br>min | Area<br>mAU*min | Height<br>mAU  | Relative Area<br>% | Relative Height<br>% | Amount |
| 1                   | 17.263                | 223.887         | 447.837        | 99.24              | 98.92                | n.a.   |
| 2                   | 22.404                | 1.703           | 4.899          | 0.76               | 1.08                 | n.a.   |
|                     |                       | <b>225.590</b>  | <b>452.736</b> | <b>100.00</b>      | <b>100.00</b>        |        |

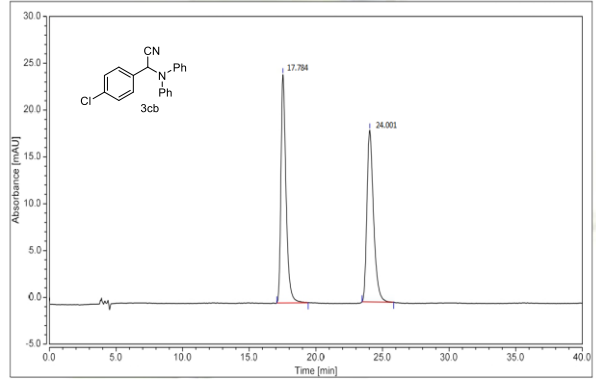

| Integration Results |                       |                 |               |                    |                      |        |
|---------------------|-----------------------|-----------------|---------------|--------------------|----------------------|--------|
| Peak                | Retention Time<br>min | Area<br>mAU*min | Height<br>mAU | Relative Area<br>% | Relative Height<br>% | Amount |
| 1                   | 17.784                | 16.192          | 24.380        | 50.47              | 57.02                | n.a.   |
| 2                   | 24.001                | 15.892          | 18.377        | 49.53              | 42.98                | n.a.   |
|                     |                       | <b>32.084</b>   | <b>42.757</b> | <b>100.00</b>      | <b>100.00</b>        |        |

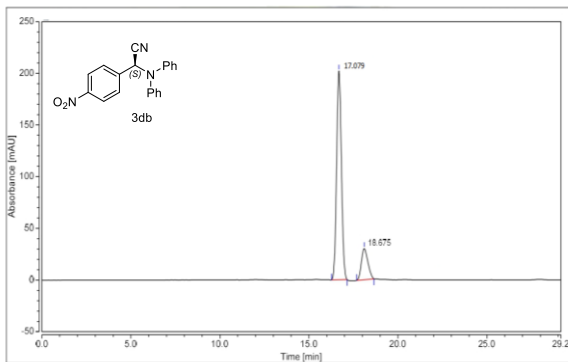

| Integration Results |                       |                 |                |                    |                      |        |
|---------------------|-----------------------|-----------------|----------------|--------------------|----------------------|--------|
| Peak                | Retention Time<br>min | Area<br>mAU*min | Height<br>mAU  | Relative Area<br>% | Relative Height<br>% | Amount |
| 1                   | 17.079                | 12.811          | 30.280         | 83.23              | 13.04                | n.a.   |
| 2                   | 18.675                | 63.581          | 202.021        | 16.77              | 86.96                | n.a.   |
|                     |                       | <b>76.393</b>   | <b>232.301</b> | <b>100.00</b>      | <b>100.00</b>        |        |

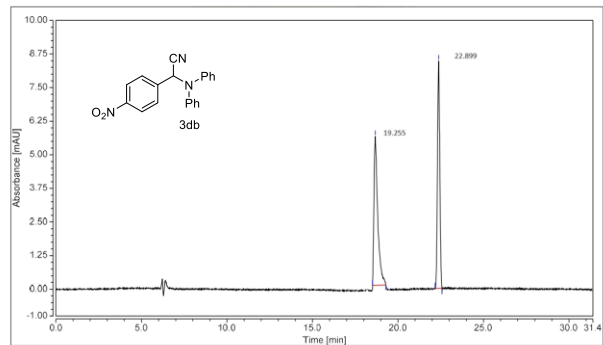

| Integration Results |                       |                 |               |                    |                      |        |
|---------------------|-----------------------|-----------------|---------------|--------------------|----------------------|--------|
| Peak                | Retention Time<br>min | Area<br>mAU*min | Height<br>mAU | Relative Area<br>% | Relative Height<br>% | Amount |
| 1                   | 19.255                | 1.422           | 5.548         | 51.44              | 38.45                | n.a.   |
| 2                   | 22.899                | 1.342           | 8.880         | 48.56              | 61.55                | n.a.   |
|                     |                       | <b>2.764</b>    | <b>14.428</b> | <b>100.00</b>      | <b>100.00</b>        |        |

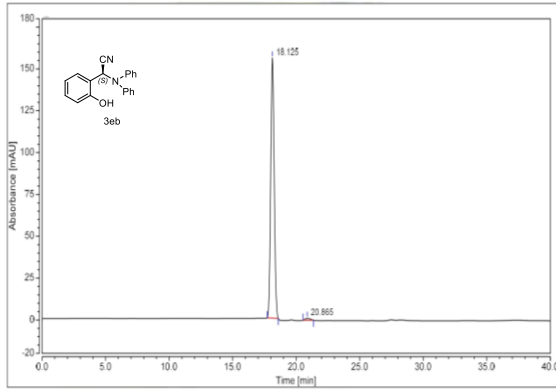

| Peak | Retention Time<br>min | Area<br>mAU*min | Height<br>mAU  | Relative Area<br>% | Relative Height<br>% | Amount |
|------|-----------------------|-----------------|----------------|--------------------|----------------------|--------|
| 1    | 18.125                | 49.142          | 155.402        | 99.00              | 99.28                | n.a.   |
| 2    | 20.865                | 0.498           | 1.127          | 1.00               | 0.72                 | n.a.   |
|      |                       | <b>49.639</b>   | <b>156.529</b> | <b>100.00</b>      | <b>100.00</b>        |        |

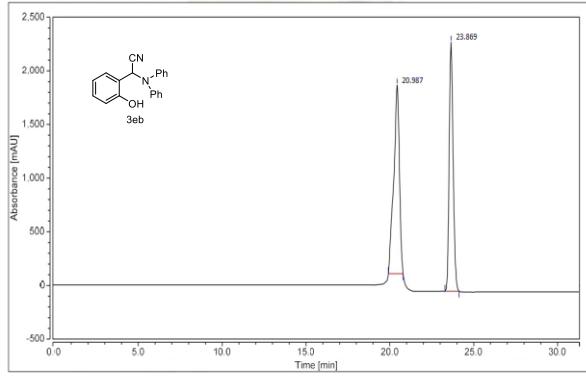

| Peak | Retention Time<br>min | Area<br>mAU*min | Height<br>mAU   | Relative Area<br>% | Relative Height<br>% | Amount |
|------|-----------------------|-----------------|-----------------|--------------------|----------------------|--------|
| 1    | 20.987                | 393.531         | 1757.120        | 52.01              | 43.10                | n.a.   |
| 2    | 23.869                | 363.068         | 2319.919        | 47.99              | 56.90                | n.a.   |
|      |                       | <b>756.599</b>  | <b>4077.039</b> | <b>100.00</b>      | <b>100.00</b>        |        |

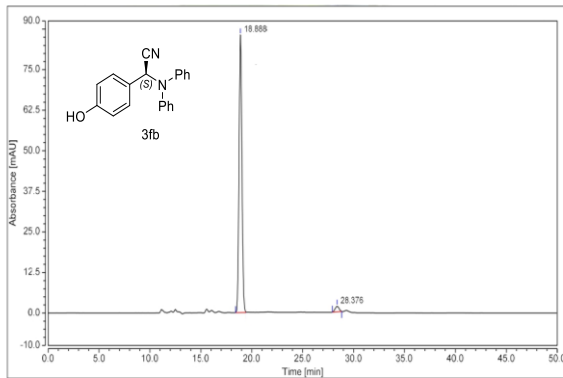

| Peak | Retention Time<br>min | Area<br>mAU*min | Height<br>mAU | Relative Area<br>% | Relative Height<br>% | Amount |
|------|-----------------------|-----------------|---------------|--------------------|----------------------|--------|
| 1    | 18.888                | 28.123          | 85.540        | 97.33              | 98.01                | n.a.   |
| 2    | 28.376                | 0.771           | 1.737         | 2.67               | 1.99                 | n.a.   |
|      |                       | <b>28.894</b>   | <b>87.277</b> | <b>100.00</b>      | <b>100.00</b>        |        |

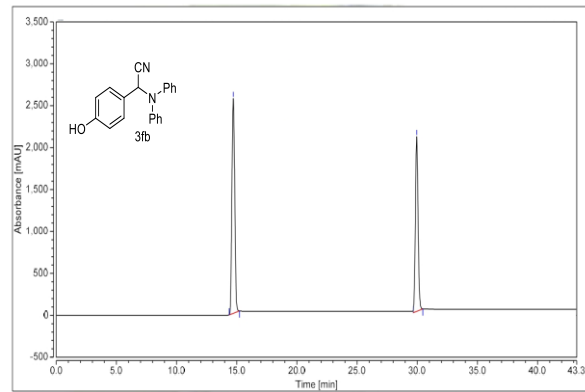

| Peak | Retention Time<br>min | Area<br>mAU*min | Height<br>mAU   | Relative Area<br>% | Relative Height<br>% | Amount |
|------|-----------------------|-----------------|-----------------|--------------------|----------------------|--------|
| 1    | 19.234                | 536.389         | 2084.317        | 51.29              | 50.97                | n.a.   |
| 2    | 30.115                | 509.368         | 2005.074        | 48.71              | 49.03                | n.a.   |
|      |                       | <b>1045.757</b> | <b>4089.391</b> | <b>100.00</b>      | <b>100.00</b>        |        |

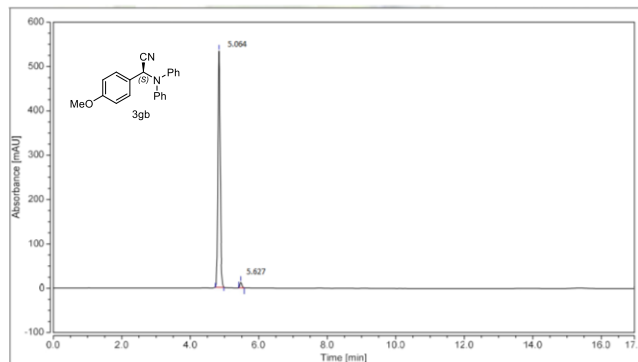

| Peak | Retention Time<br>min | Area<br>mAU*min | Height<br>mAU  | Relative Area<br>% | Relative Height<br>% | Amount |
|------|-----------------------|-----------------|----------------|--------------------|----------------------|--------|
| 1    | 5.064                 | 42.011          | 532.753        | 96.07              | 97.76                | n.a.   |
| 2    | 5.627                 | 0.828           | 12.216         | 1.93               | 2.24                 | n.a.   |
|      |                       | <b>42.839</b>   | <b>544.969</b> | <b>100.00</b>      | <b>100.00</b>        |        |

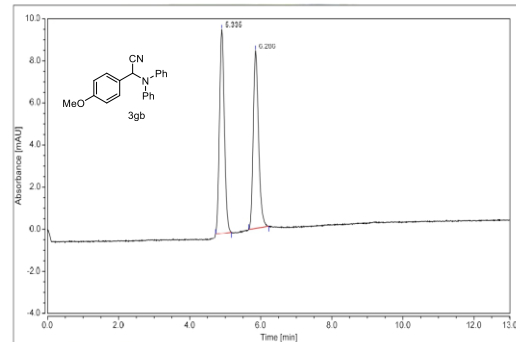

| Peak | Retention Time<br>min | Area<br>mAU*min | Height<br>mAU | Relative Area<br>% | Relative Height<br>% | Amount |
|------|-----------------------|-----------------|---------------|--------------------|----------------------|--------|
| 1    | 5.335                 | 5.335           | 1.765         | 11.009             | 51.53                | n.a.   |
| 2    | 6.286                 | 1.861           | 9.569         | 48.47              | 46.50                | n.a.   |
|      |                       | <b>3.426</b>    | <b>20.578</b> | <b>100.00</b>      | <b>100.00</b>        |        |



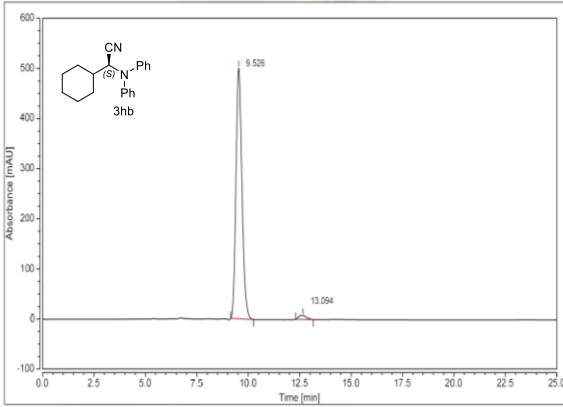

| Peak | Retention Time min | Area mAU*min   | Height mAU     | Relative Area % | Relative Height % | Amount |
|------|--------------------|----------------|----------------|-----------------|-------------------|--------|
| 1    | 9.526              | 3.367          | 7.785          | 98.05           | 1.53              | n.a.   |
| 2    | 13.094             | 169.371        | 500.505        | 1.95            | 98.47             | n.a.   |
|      |                    | <b>172.738</b> | <b>508.290</b> | <b>100.00</b>   | <b>100.00</b>     |        |

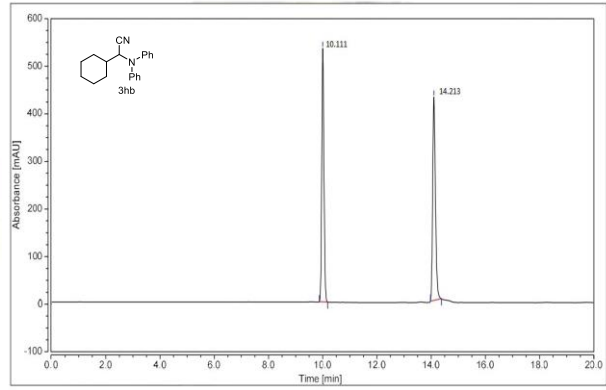

| Peak | Retention Time min | Area mAU*min  | Height mAU     | Relative Area % | Relative Height % | Amount |
|------|--------------------|---------------|----------------|-----------------|-------------------|--------|
| 1    | 10.111             | 42.543        | 427.287        | 50.28           | 44.50             | n.a.   |
| 2    | 14.213             | 42.074        | 532.961        | 49.72           | 55.50             | n.a.   |
|      |                    | <b>84.617</b> | <b>960.248</b> | <b>100.00</b>   | <b>100.00</b>     |        |

## HPLC OF 6 and 7

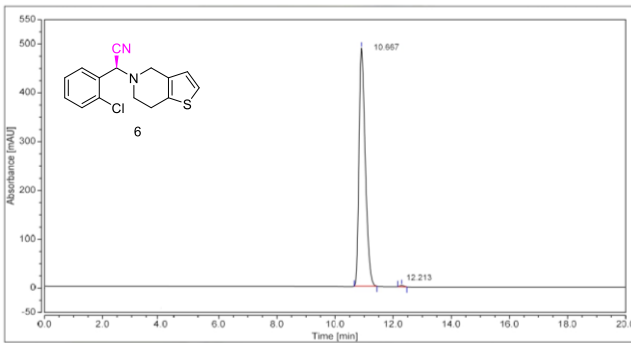

| Peak | Retention Time min | Area mAU*min   | Height mAU     | Relative Area % | Relative Height % | Amount |
|------|--------------------|----------------|----------------|-----------------|-------------------|--------|
| 1    | 10.667             | 122.419        | 487.866        | 99.67           | 99.62             | n.a.   |
| 2    | 12.213             | 0.400          | 2.356          | 0.33            | 0.48              | n.a.   |
|      |                    | <b>122.819</b> | <b>490.222</b> | <b>100.00</b>   | <b>100.00</b>     |        |

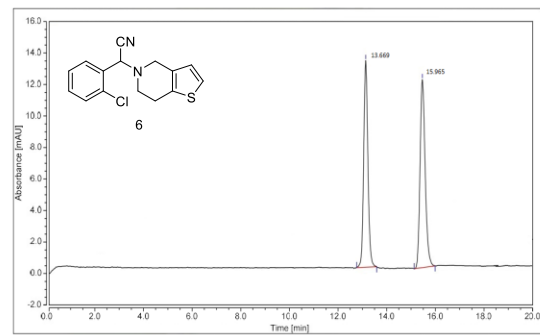

| Peak | Retention Time min | Area mAU*min | Height mAU    | Relative Area % | Relative Height % | Amount |
|------|--------------------|--------------|---------------|-----------------|-------------------|--------|
| 1    | 13.669             | 1.470        | 11.934        | 52.47           | 47.63             | n.a.   |
| 2    | 15.965             | 1.332        | 13.121        | 47.53           | 52.37             | n.a.   |
|      |                    | <b>2.802</b> | <b>25.055</b> | <b>100.00</b>   | <b>100.00</b>     |        |

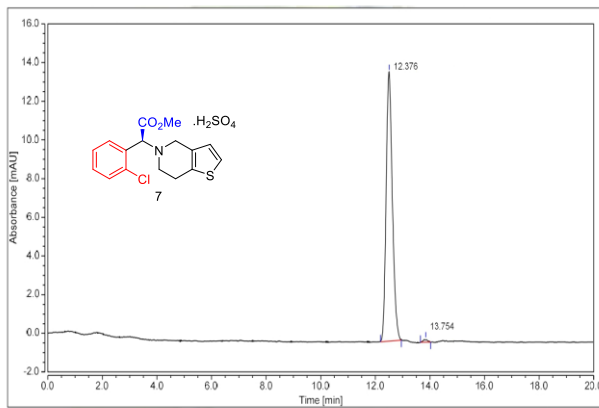

| Peak | Retention Time min | Area mAU*min | Height mAU    | Relative Area % | Relative Height % | Amount |
|------|--------------------|--------------|---------------|-----------------|-------------------|--------|
| 1    | 12.376             | 3.673        | 13.941        | 99.25           | 98.84             | n.a.   |
| 2    | 13.754             | 0.028        | 0.163         | 0.75            | 1.16              | n.a.   |
|      |                    | <b>3.701</b> | <b>14.104</b> | <b>100.00</b>   | <b>100.00</b>     |        |

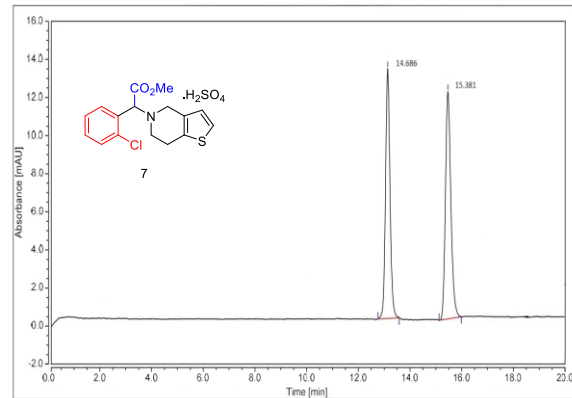

| Peak | Retention Time min | Area mAU*min | Height mAU    | Relative Area % | Relative Height % | Amount |
|------|--------------------|--------------|---------------|-----------------|-------------------|--------|
| 1    | 14.686             | 1.470        | 11.934        | 52.47           | 47.63             | n.a.   |
| 2    | 15.381             | 1.332        | 13.121        | 47.53           | 52.37             | n.a.   |
|      |                    | <b>2.802</b> | <b>25.055</b> | <b>100.00</b>   | <b>100.00</b>     |        |

### 13. References:

1. C. D. Gutsche, M. I., P-Tert-BUTYLCALIX[4]ARENE. *Organic Synthesis* **1990**, *68*, 234.
2. Jiao, Z.; Feng, X.; Liu, B.; Chen, F.; Zhang, G.; Jiang, Y., Enantioselective Strecker Reactions between Aldimines and Trimethylsilyl Cyanide Promoted by Chiral N,N'-Dioxides. *Eur. J. Org. Chem.* **2003**, *2003*, 3818-3826
